# Supplementary material for: Diet Quality Scores and Prediction of All-Cause, Cardiovascular and Cancer Mortality in a Pan-European Cohort Study
Source: PubMed Central journal article supplement (PMC4943719; doi:10.1371/journal.pone.0159025), 2016-07-13

**S2a Fig. Multivariate hazard ratios (Model 2: adjusted for age and lifestyle risk factors) for 10-year all-cause mortality risk for a 1SD increase of score among 451,256 participants of the EPIC study, by country**

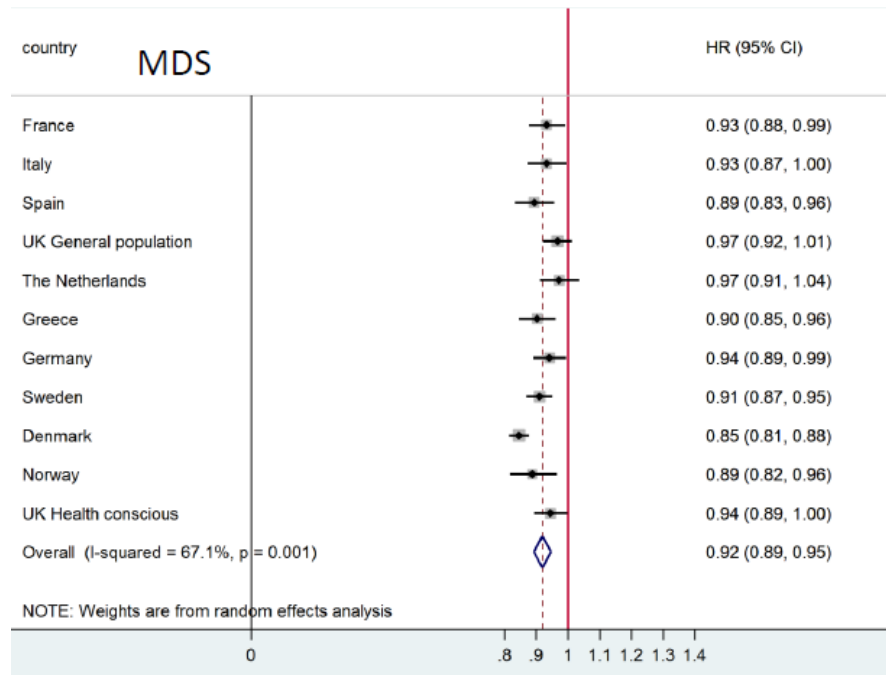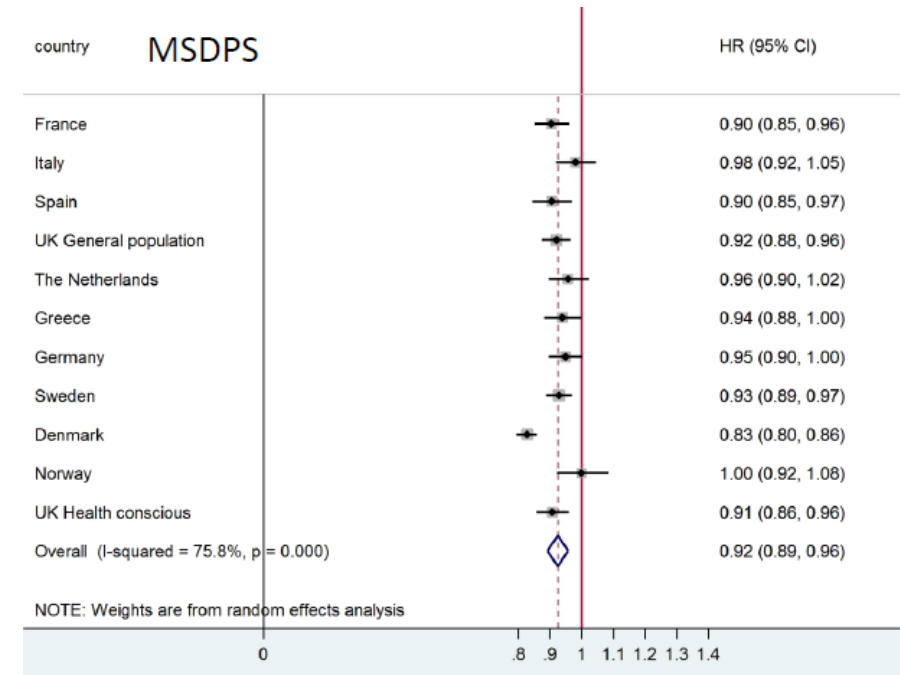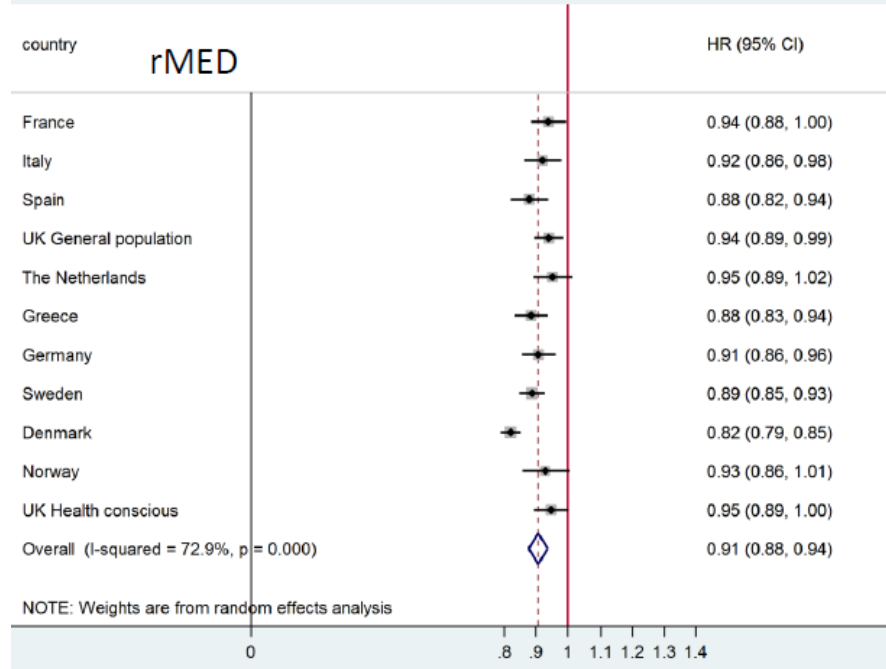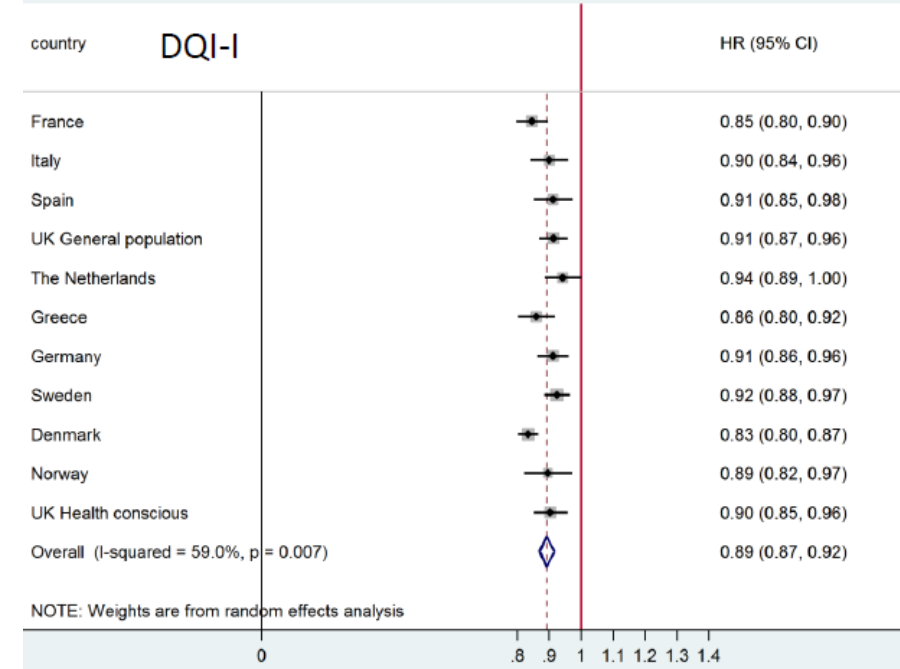

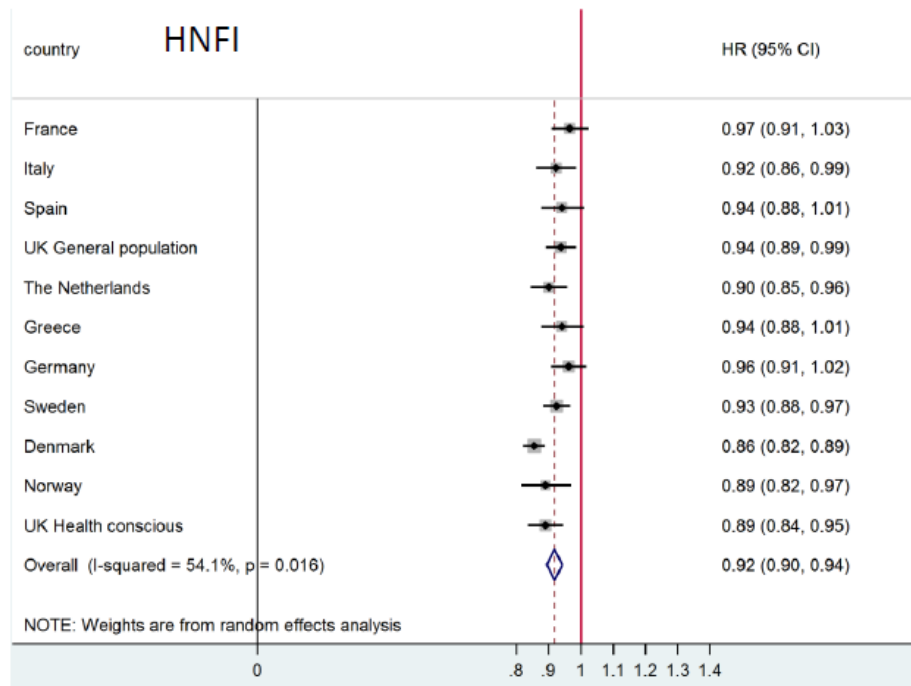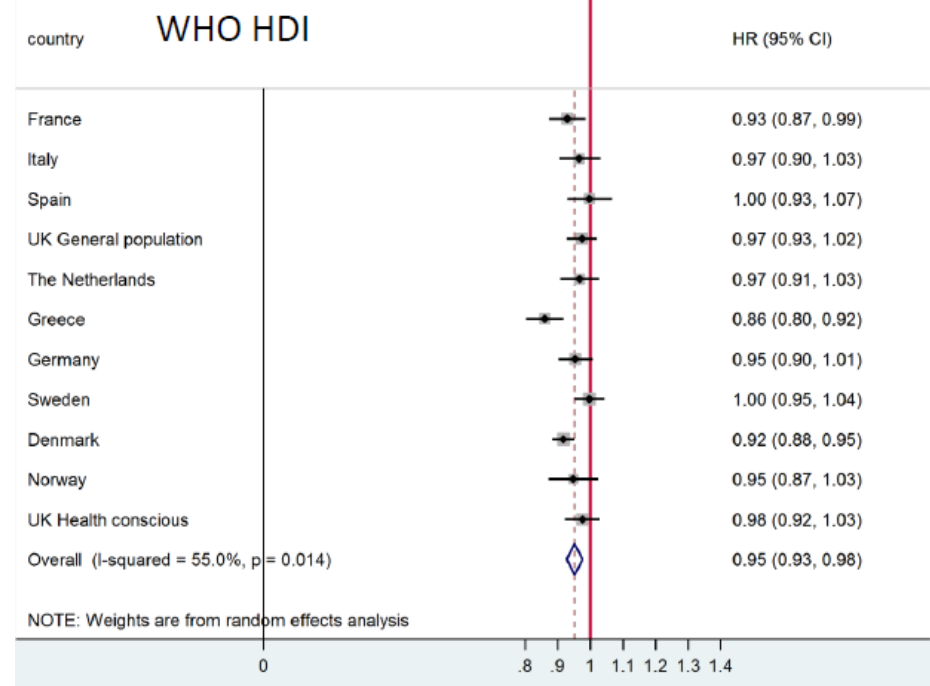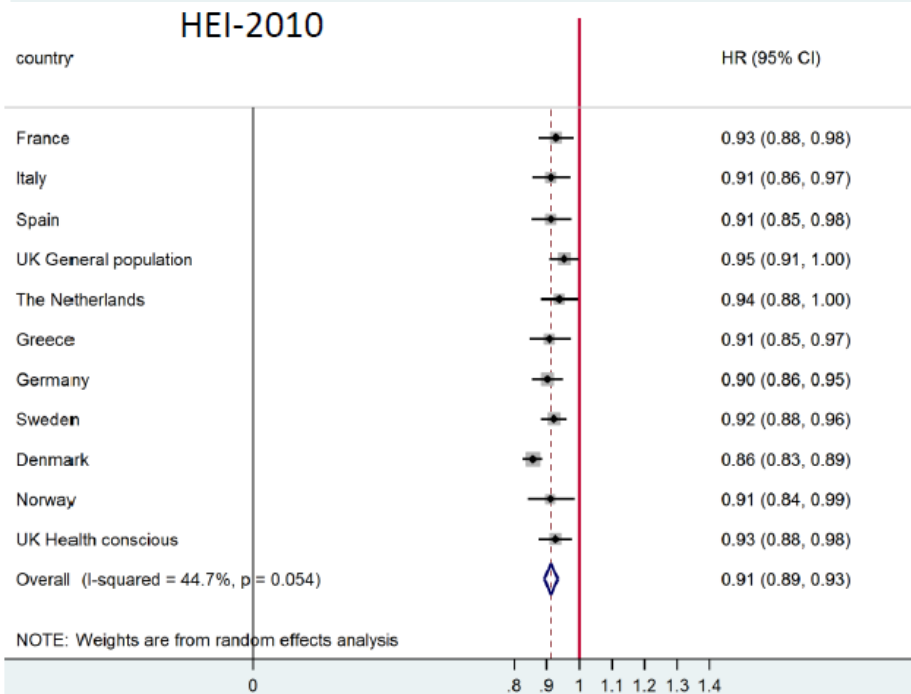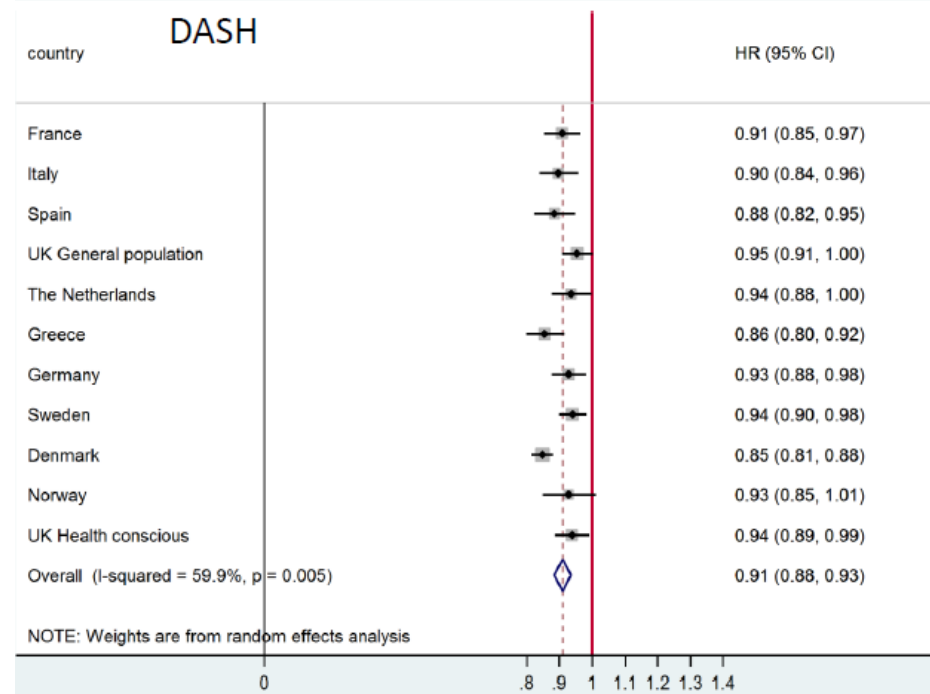

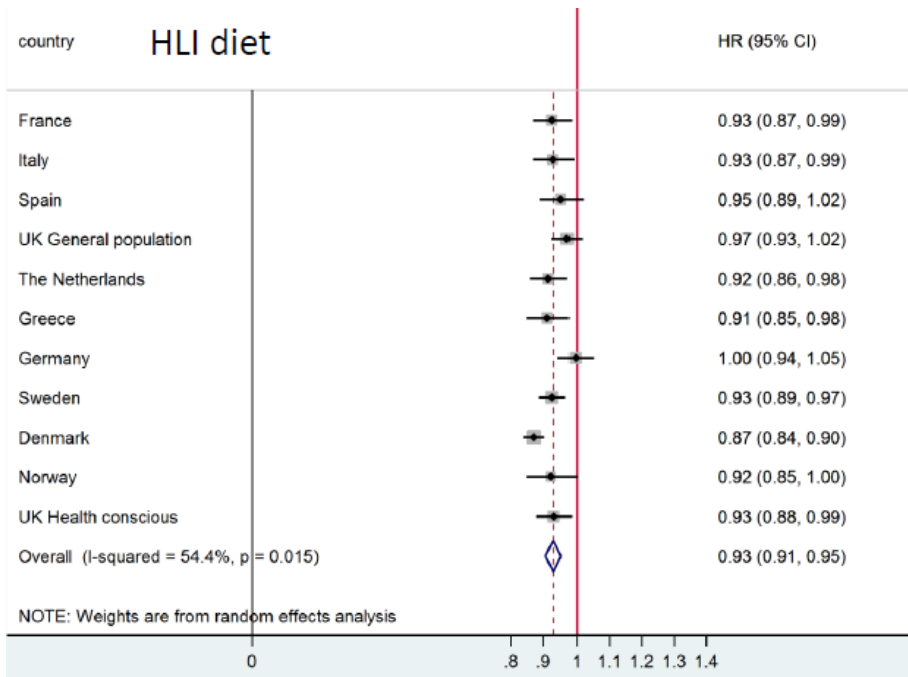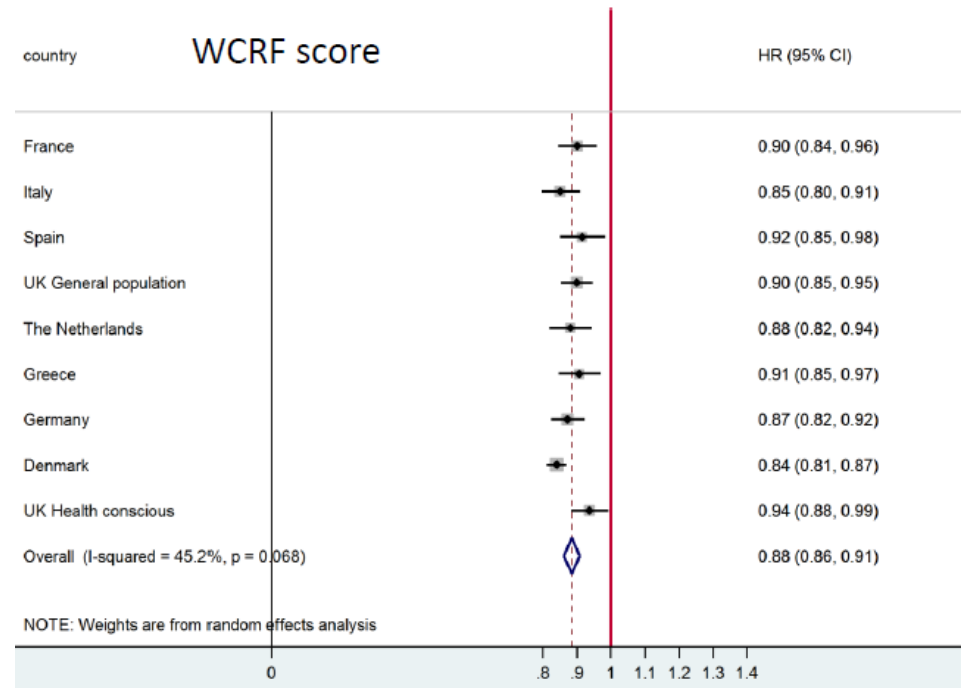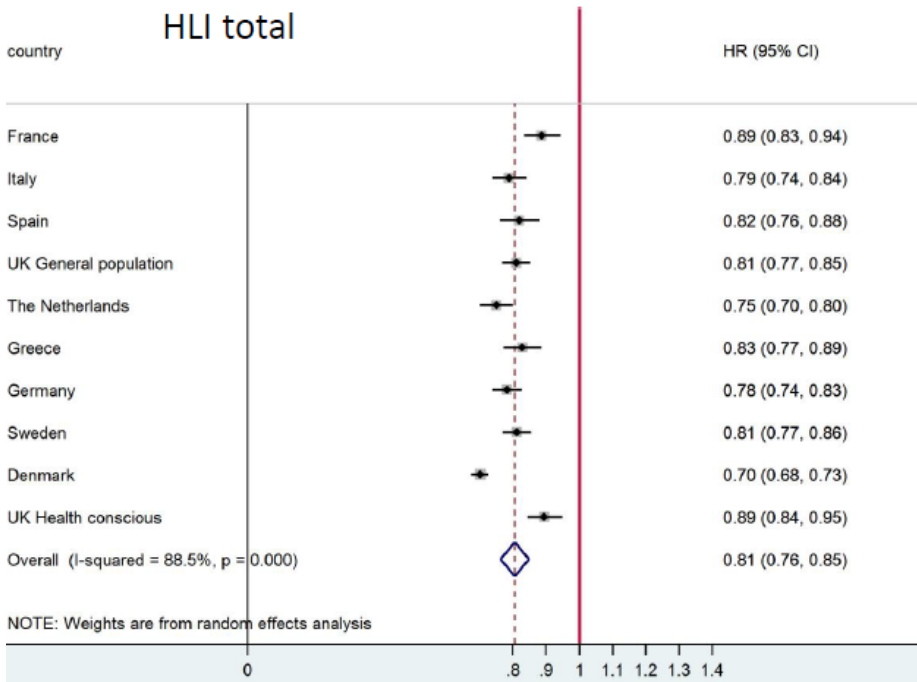

**S2b Fig. Multivariate hazard ratios (Model 2: adjusted for age and lifestyle risk factors) for 10-year CVD mortality risk for a 1SD increase of score among 451,256 participants of the EPIC study, by country.**

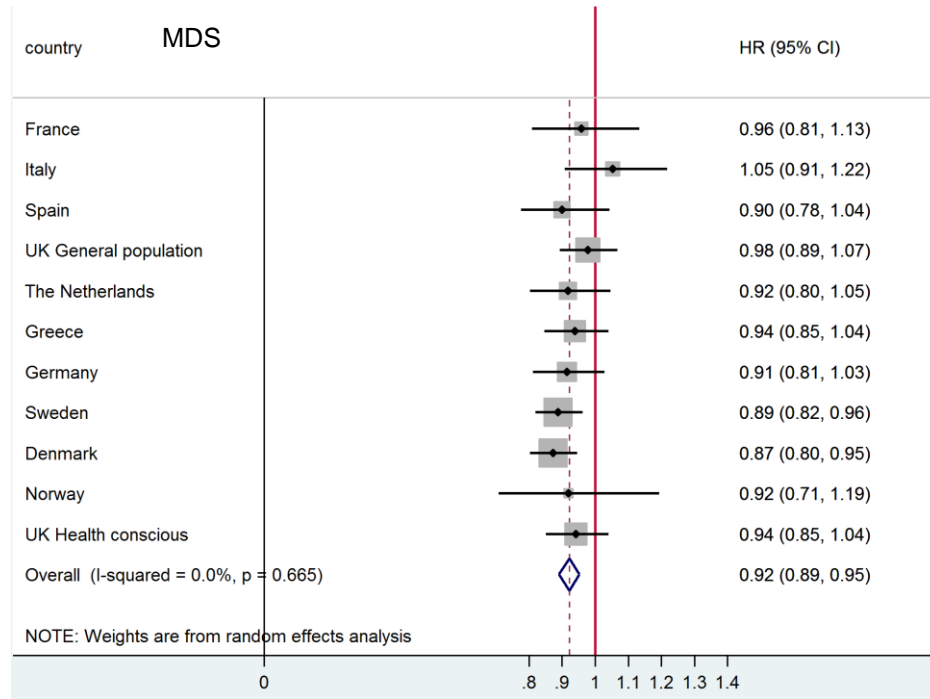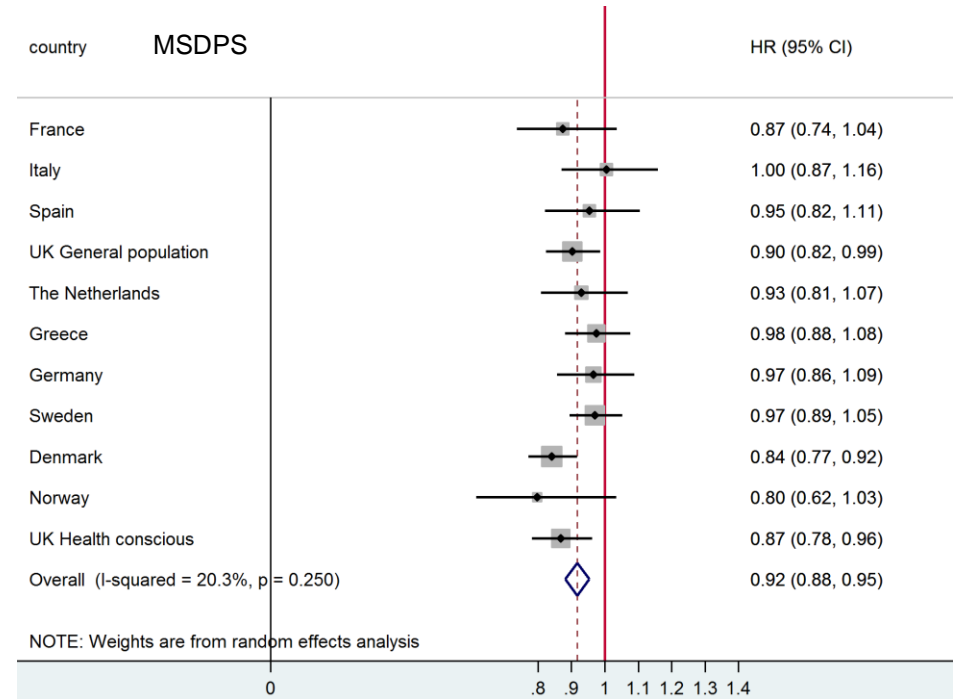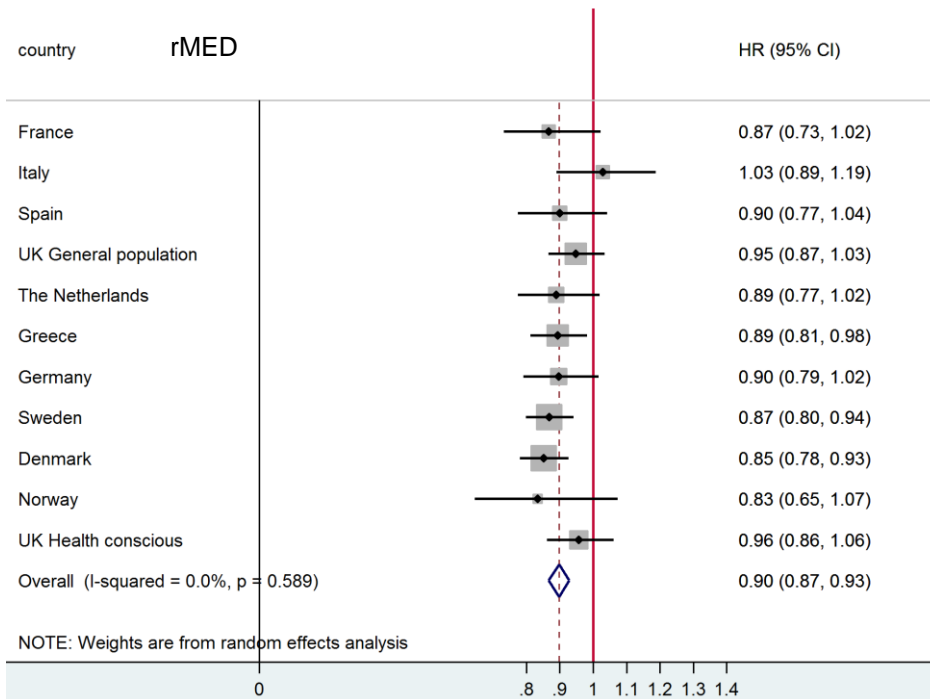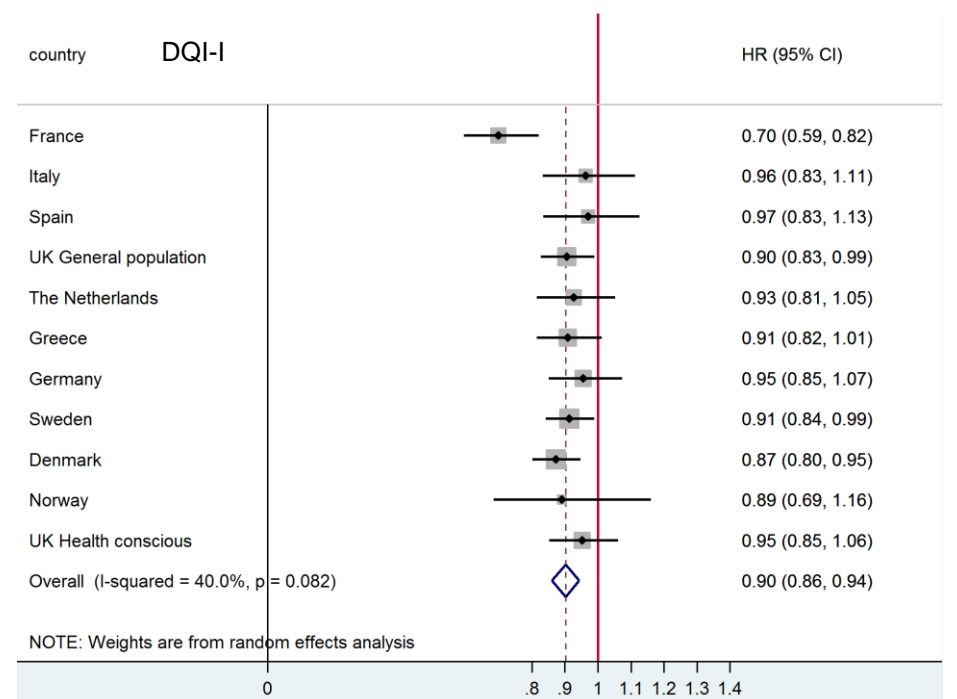

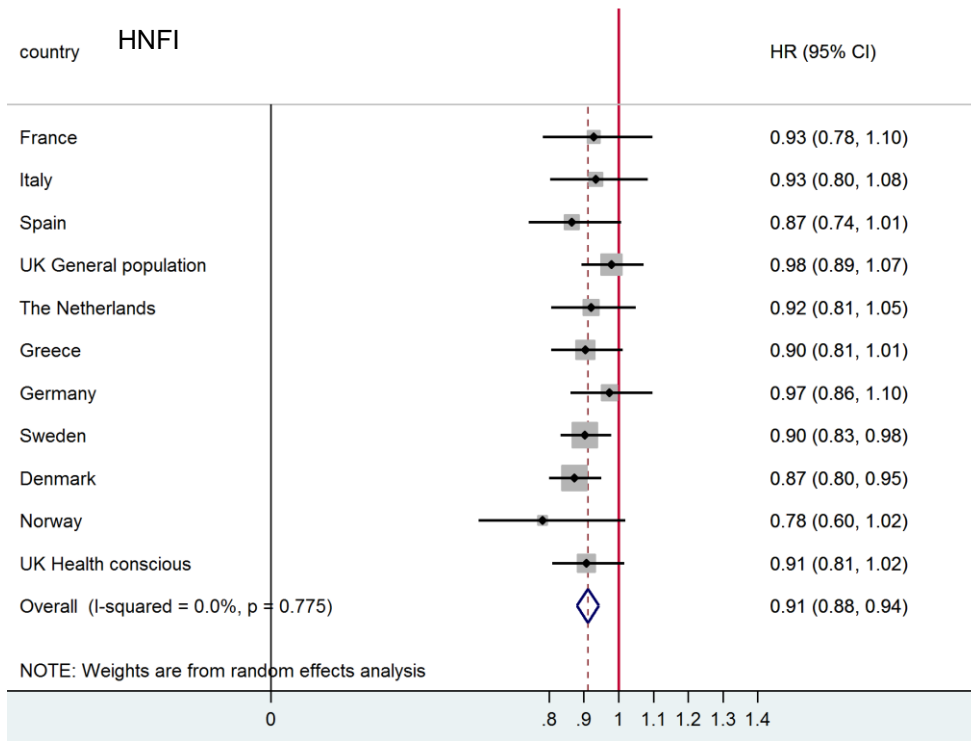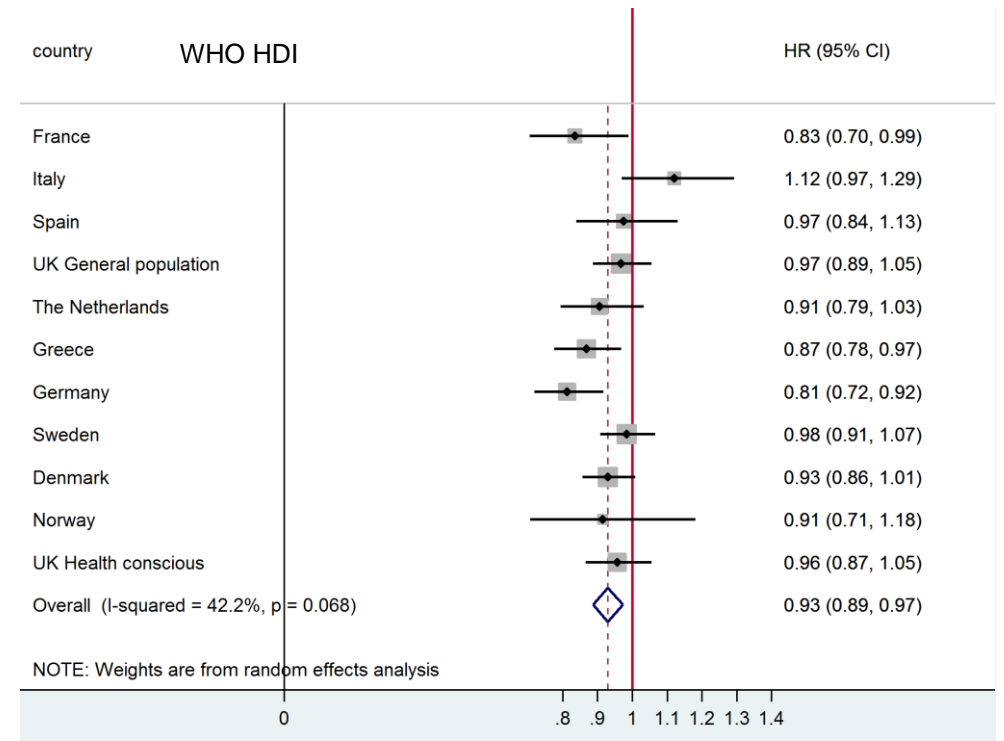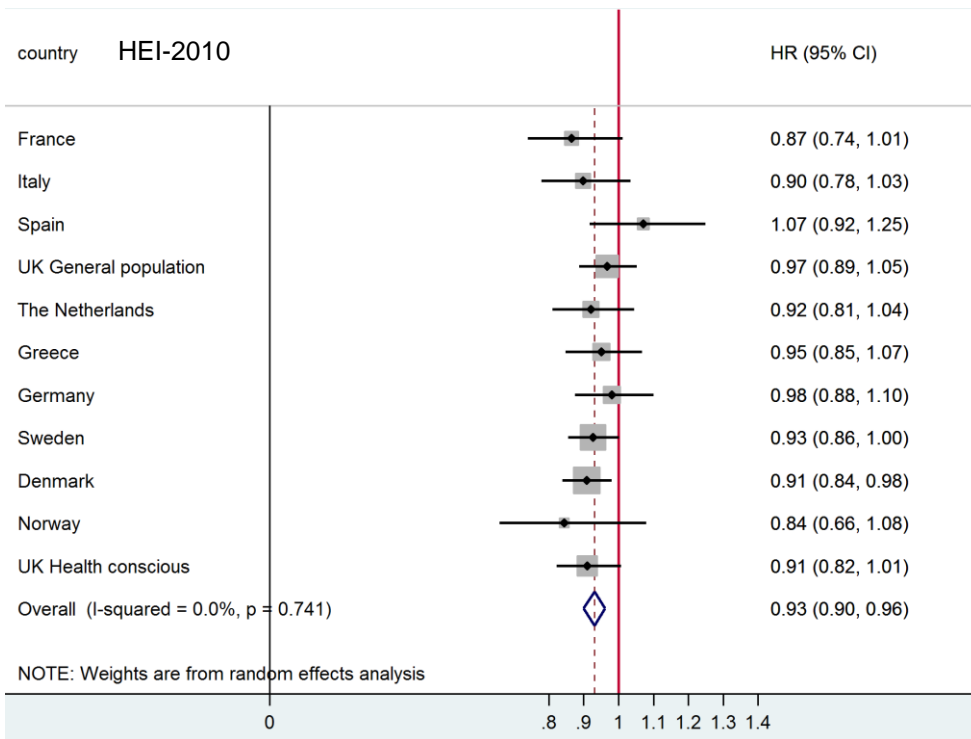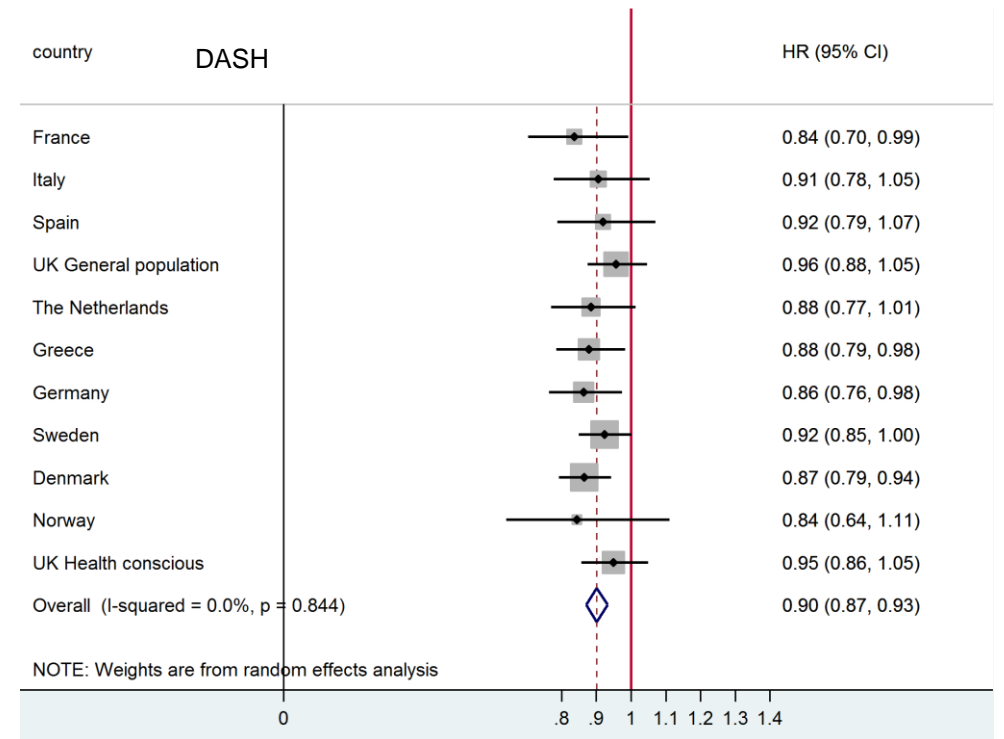

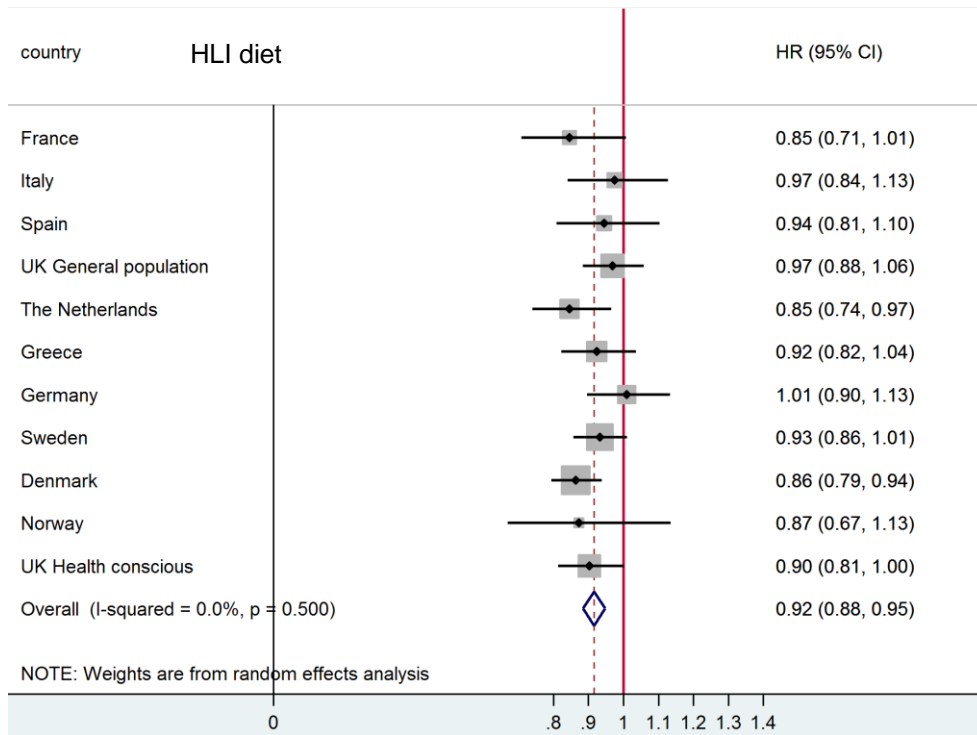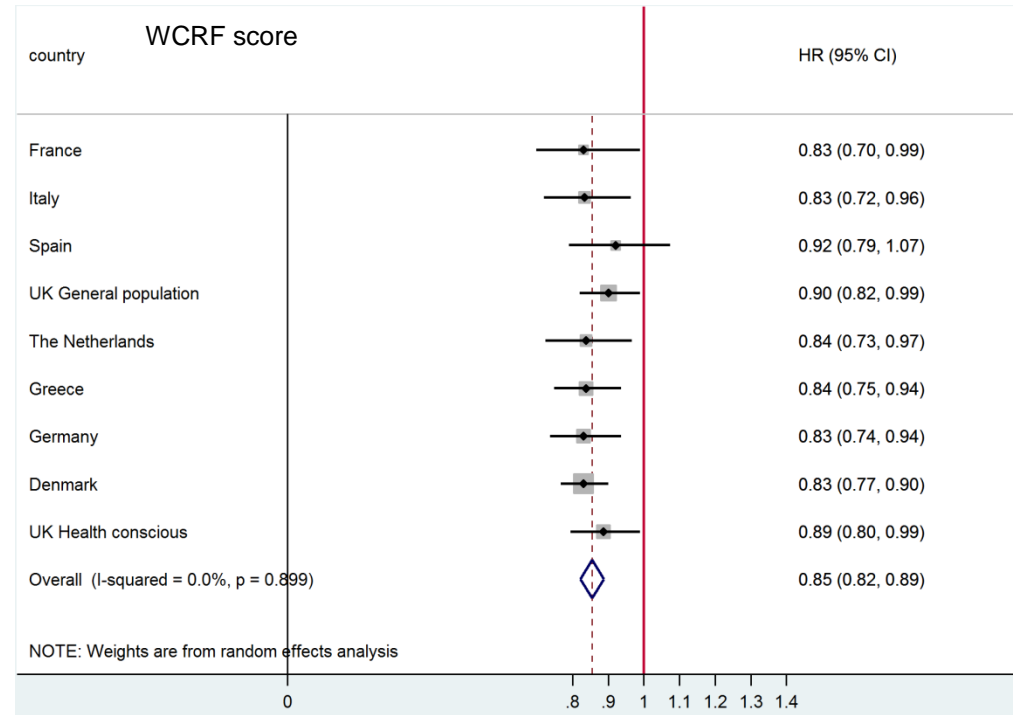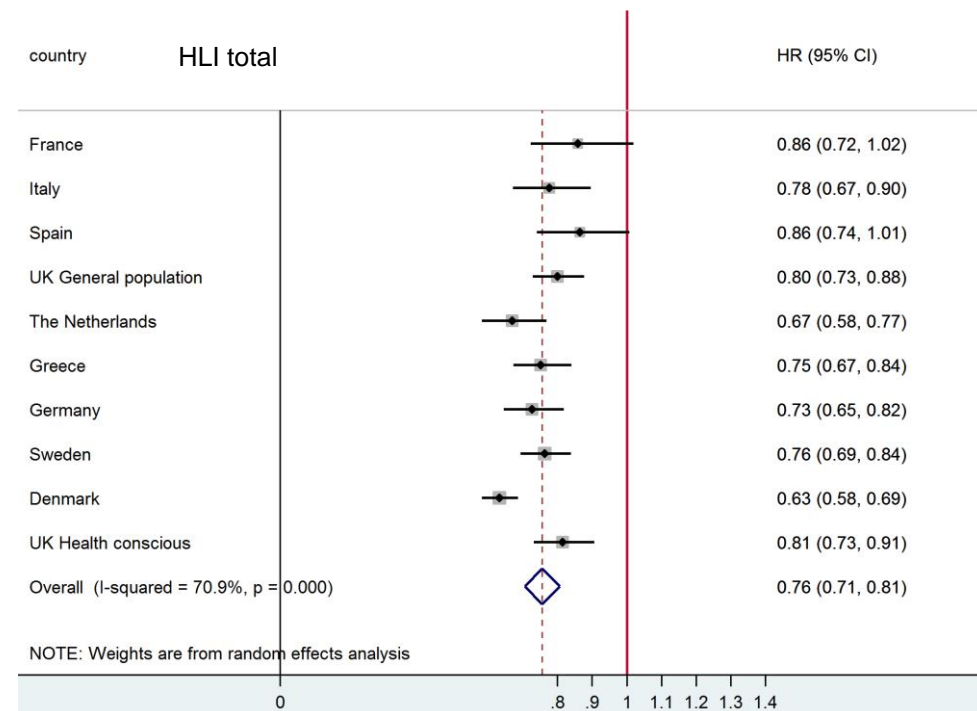

**S2c Fig. Multivariate hazard ratios (Model 2: adjusted for age and lifestyle risk factors) for 10-year cancer mortality risk for a 1SD increase of score among 451,256 participants of the EPIC study, by country.**

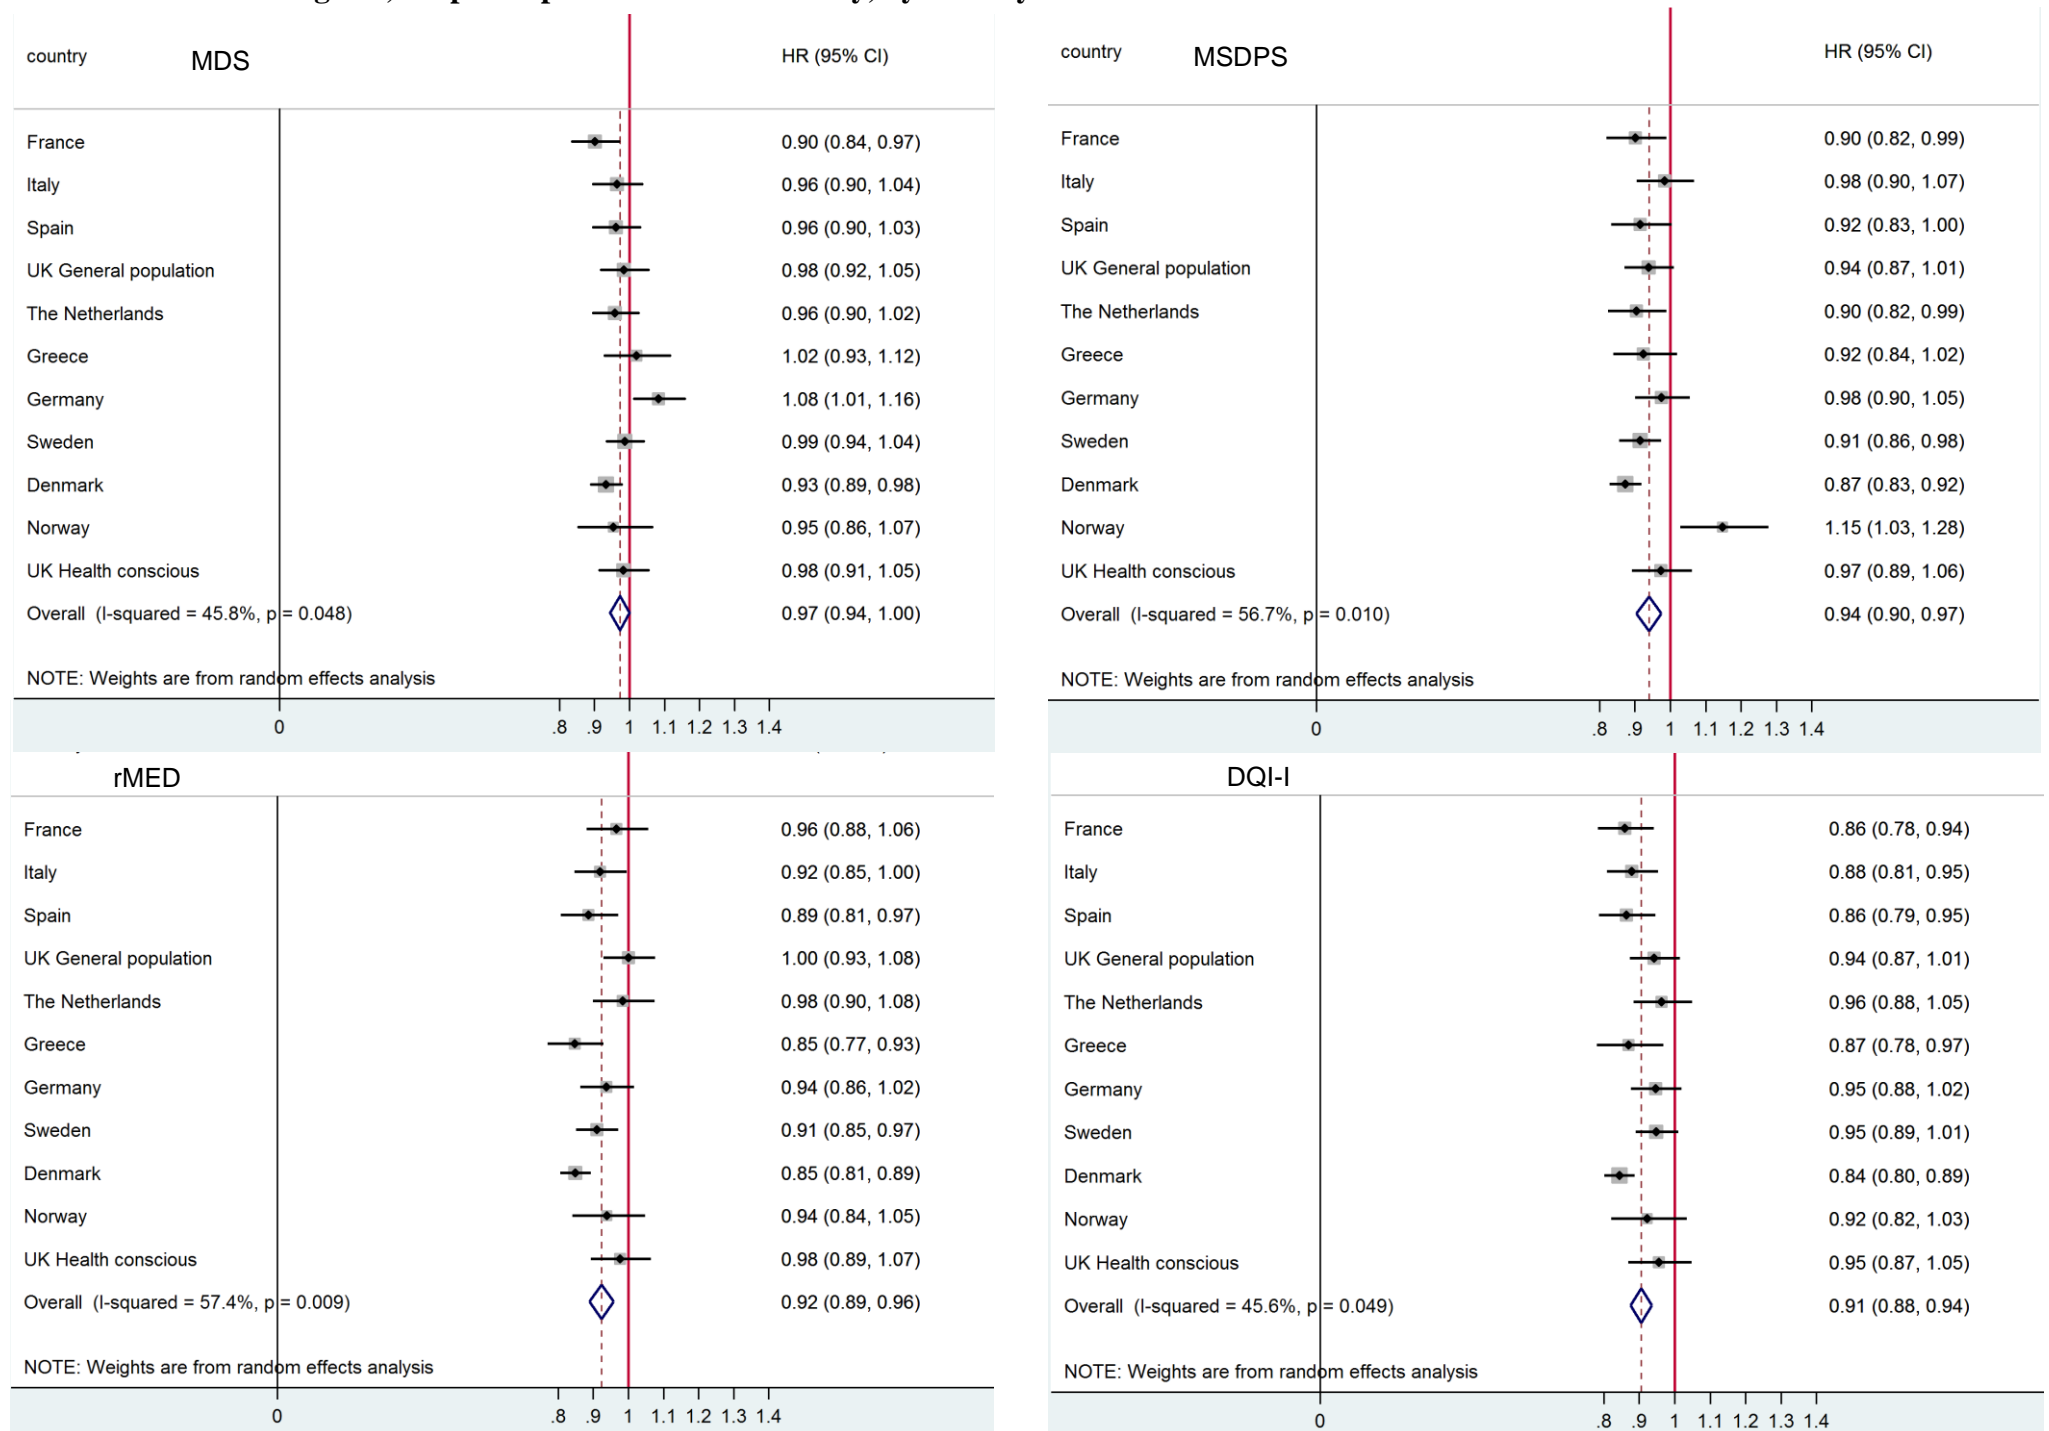



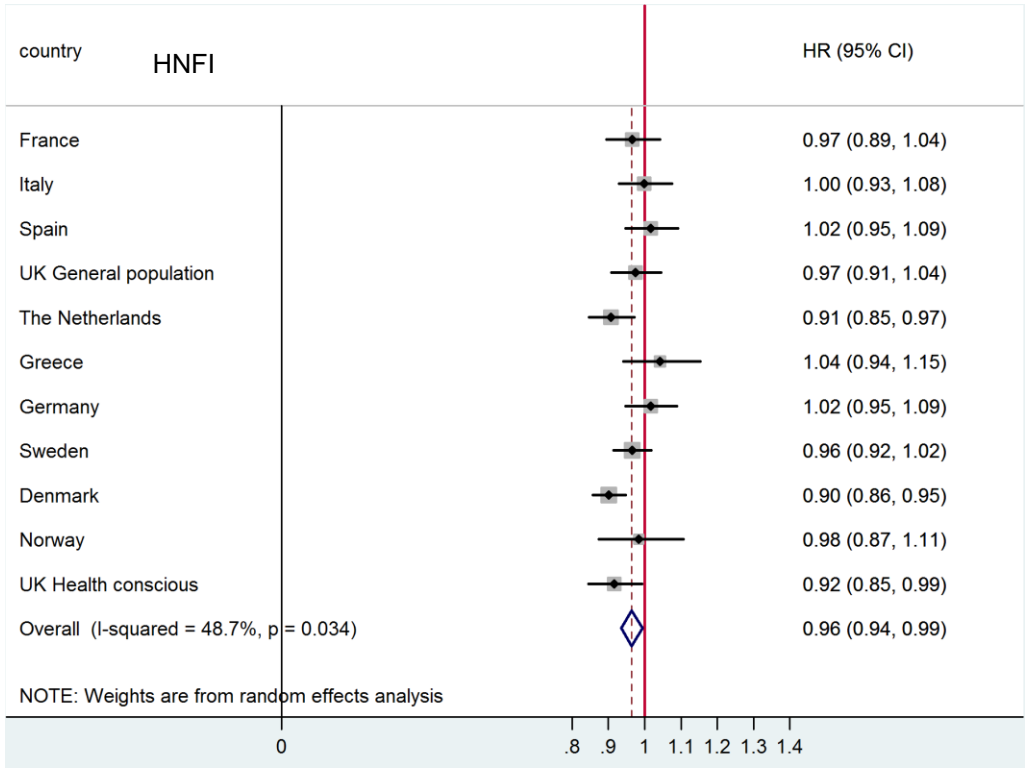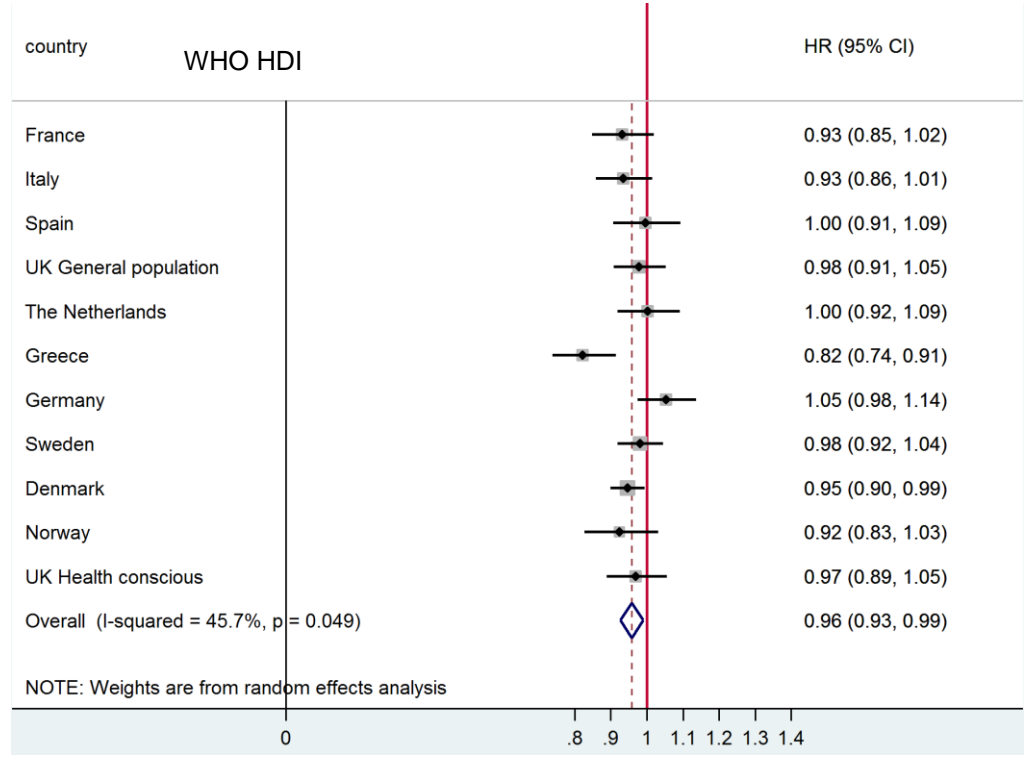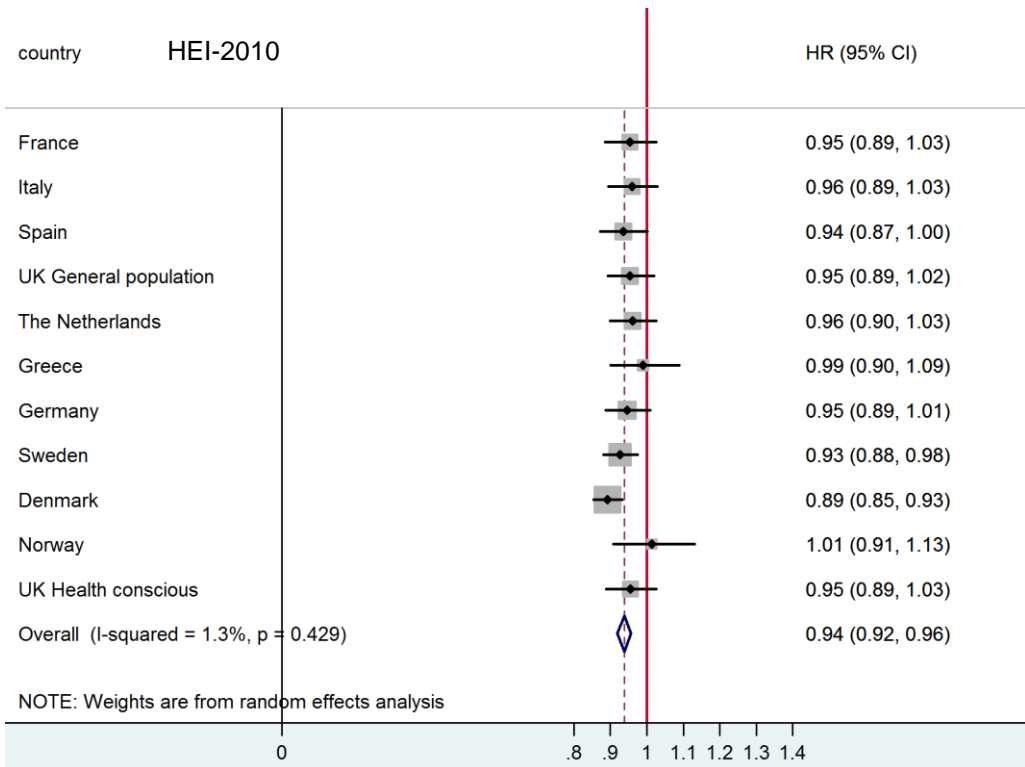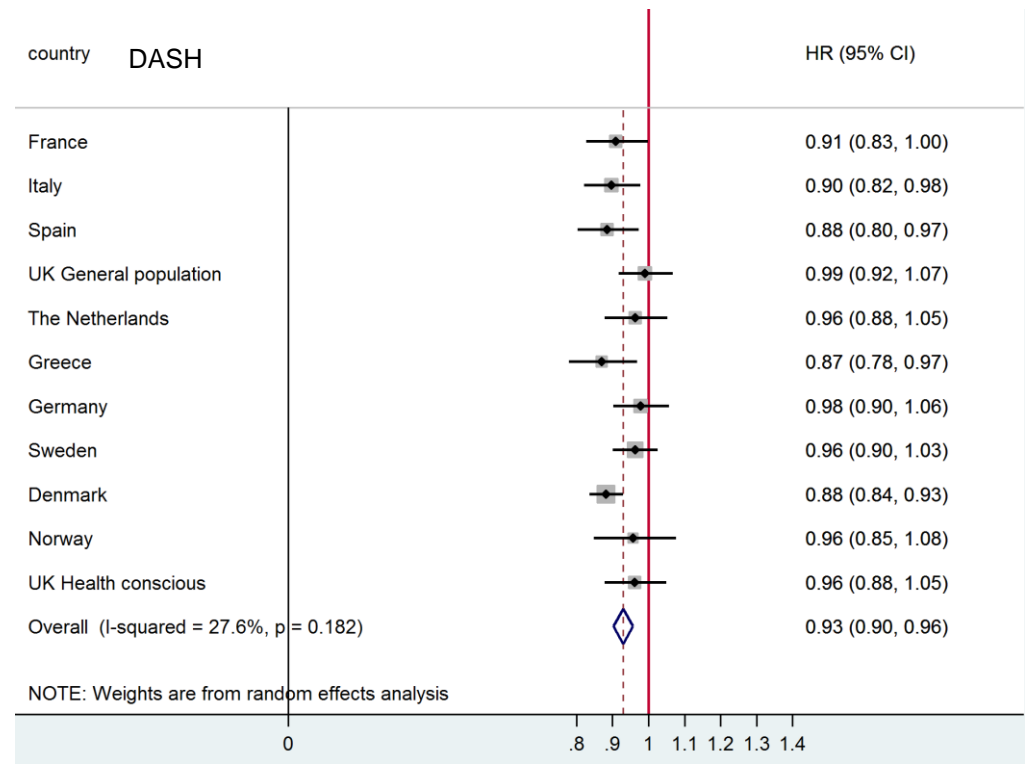



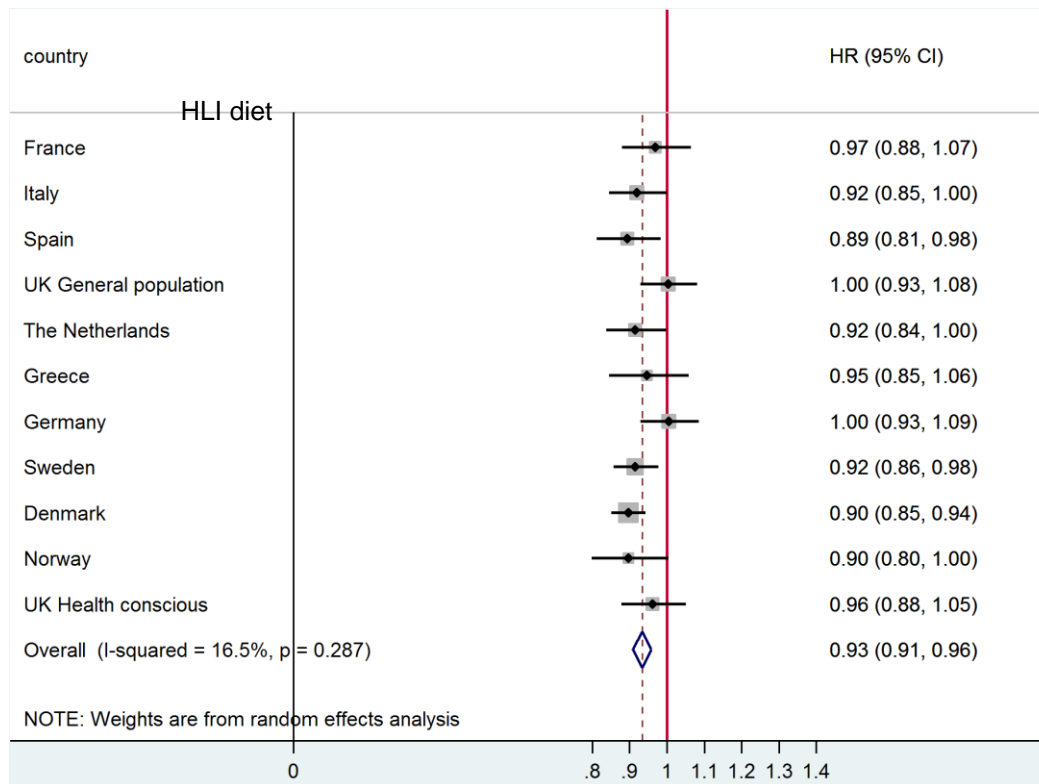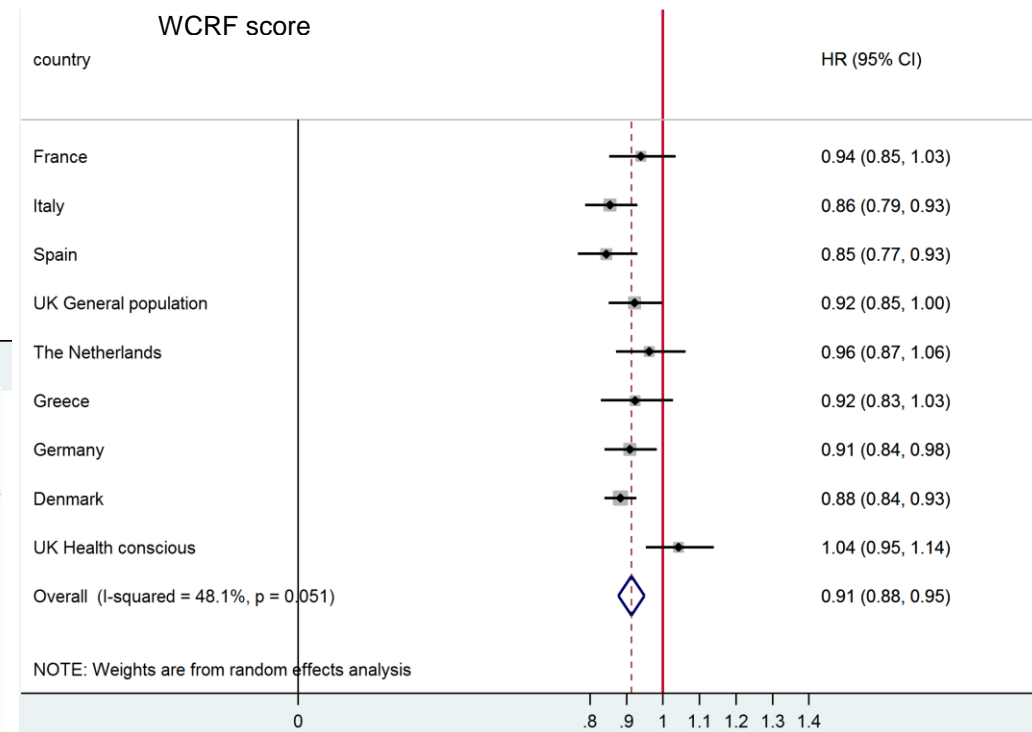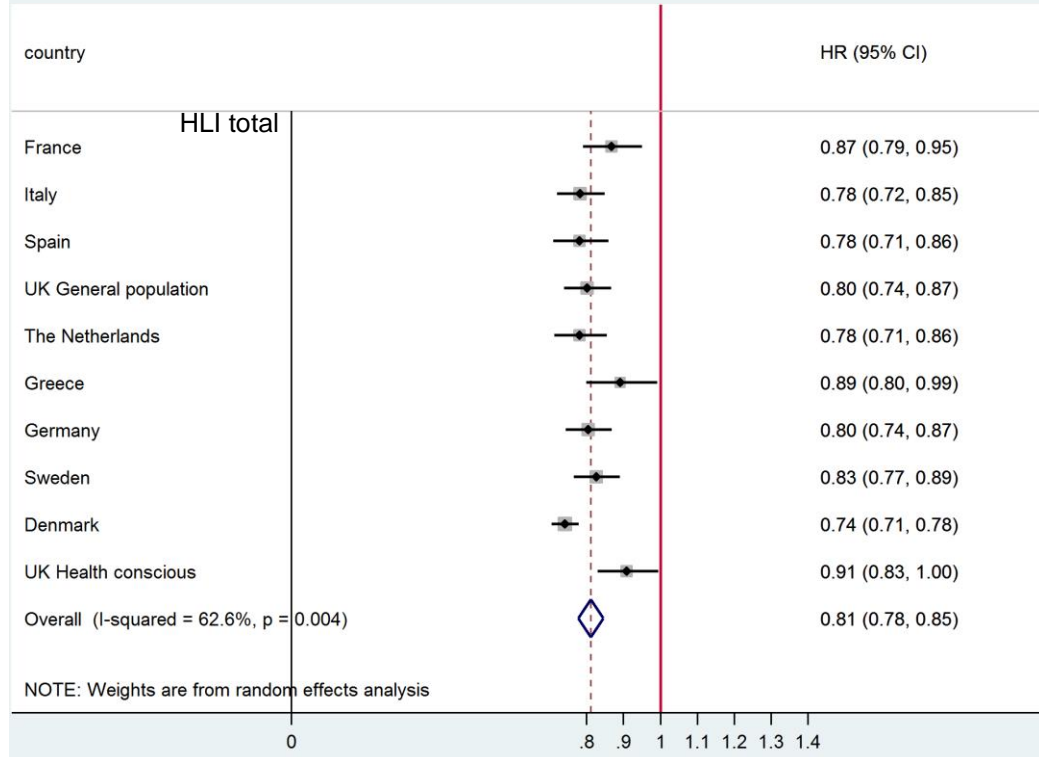

Supplement: pone.0159025.s002.pdf [file pone.0159025.s002.pdf]
