# Supplementary material for: Diet Quality Scores and Prediction of All-Cause, Cardiovascular and Cancer Mortality in a Pan-European Cohort Study
Source: PubMed Central journal article supplement (PMC4943719; doi:10.1371/journal.pone.0159025), 2016-07-13
Supplement: pone.0159025.s001.pdf [file pone.0159025.s001.pdf]

**S1a Fig. Calibration plots for all diet and lifestyle quality scores associated with 10-year risk of all-cause mortality among 451,256 participants of the EPIC study**

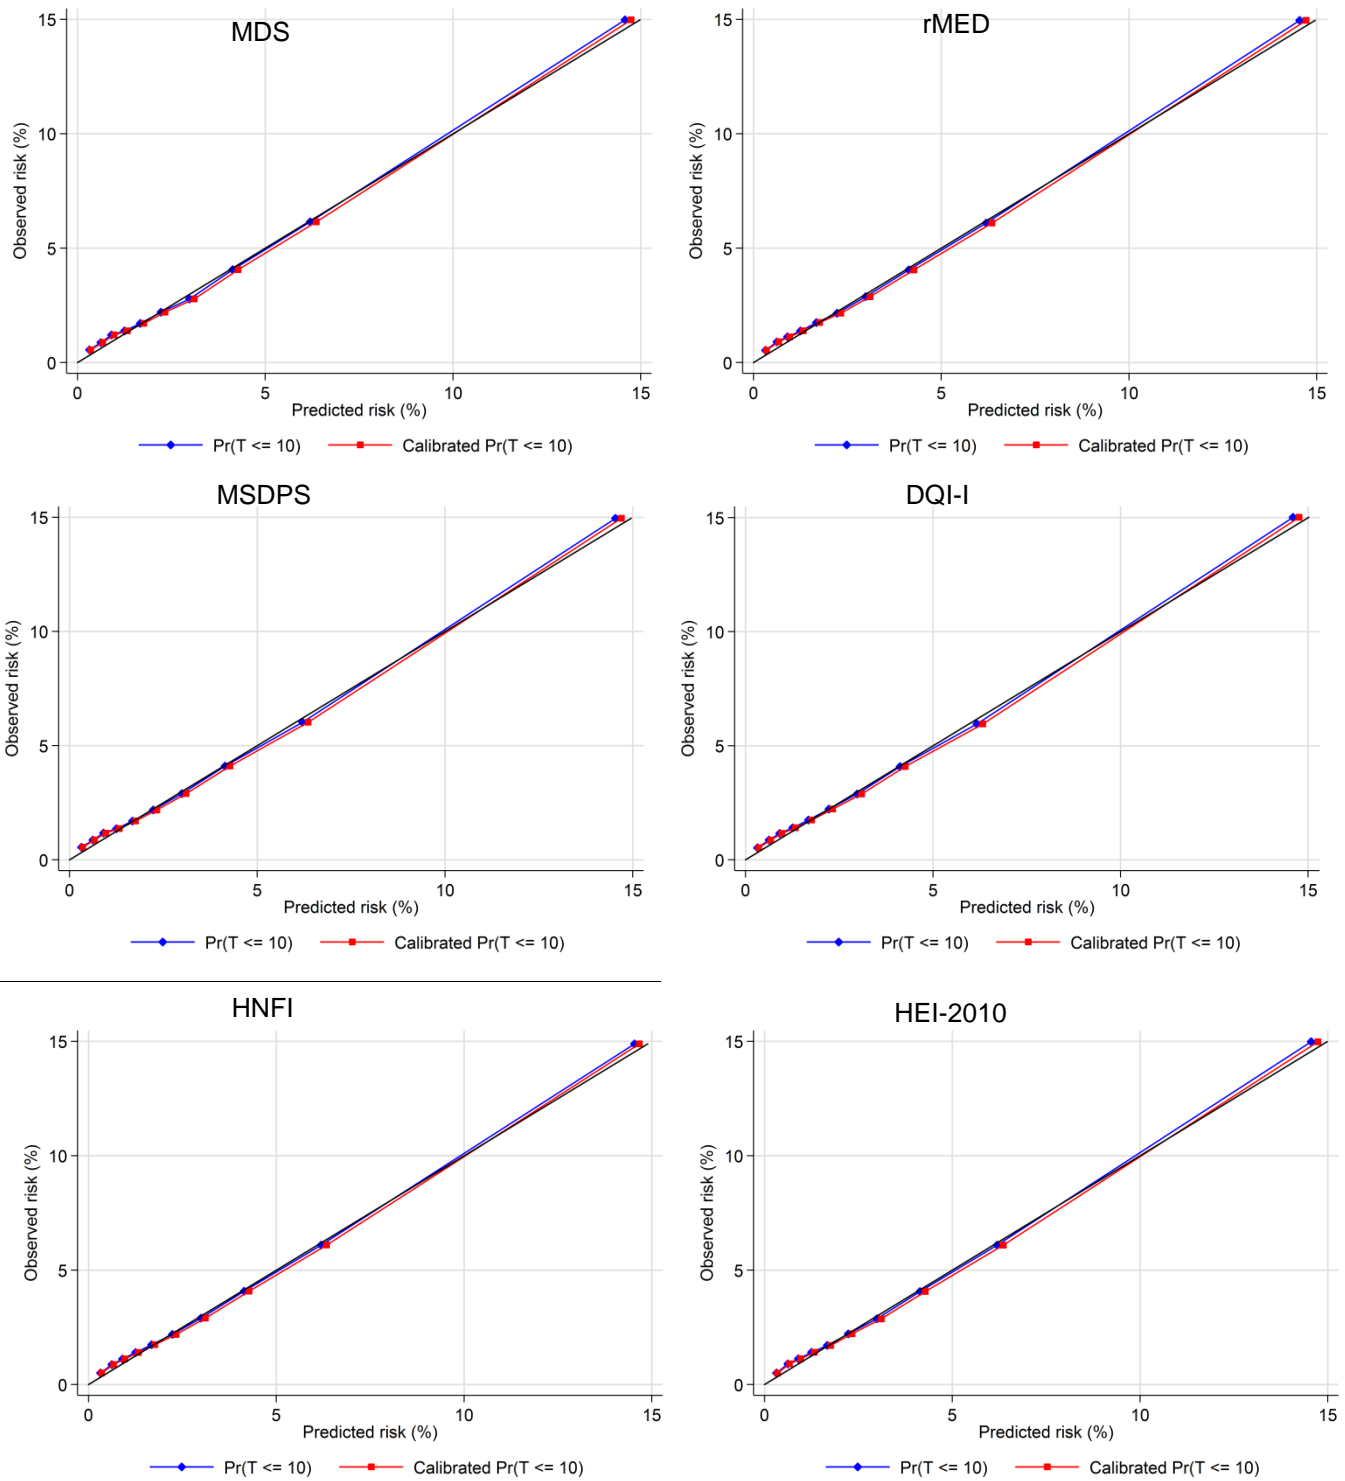

WHO HDI

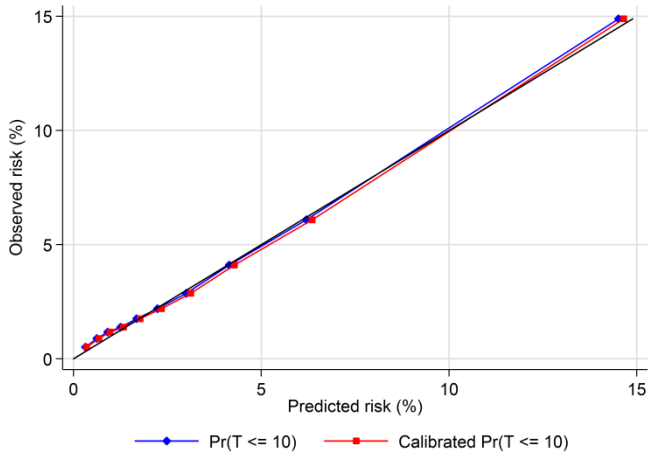

DASH

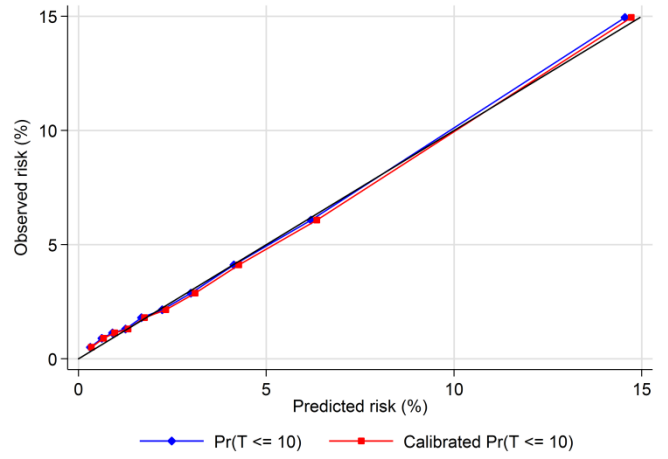

HLI-diet

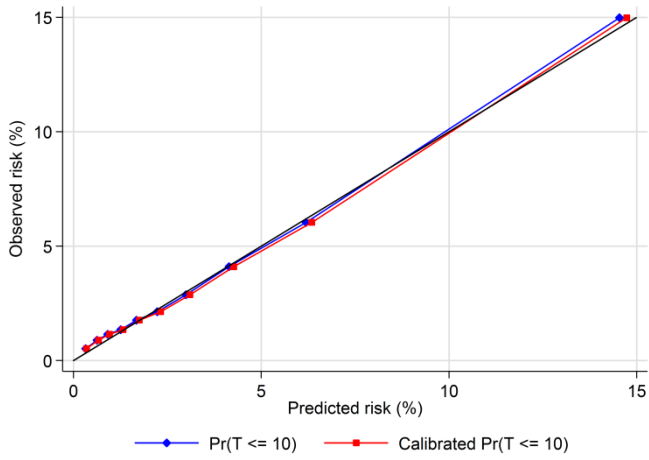

HLI-total

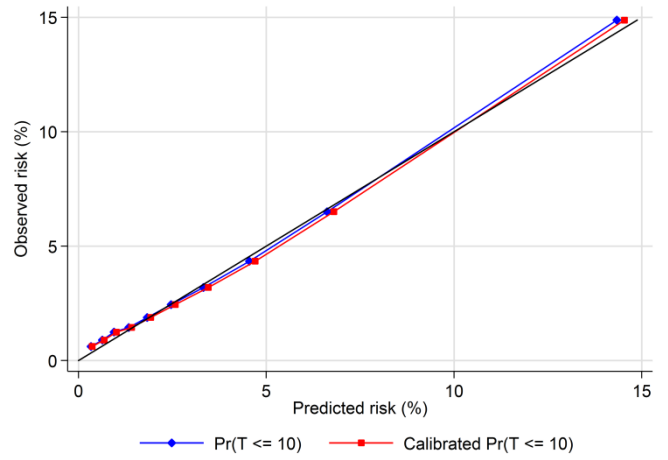

WCRF

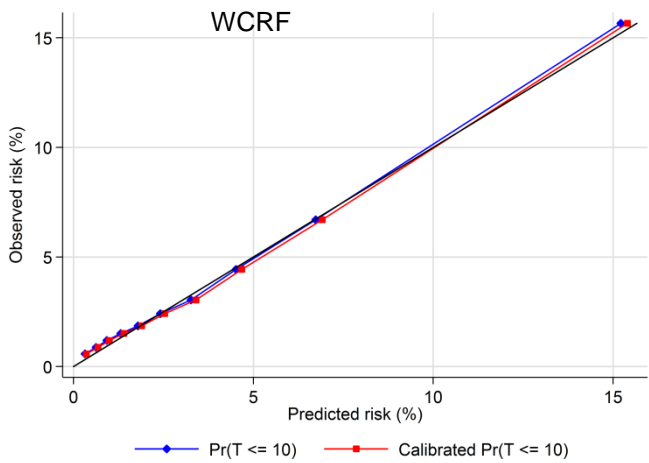

**S1b Fig. Calibration plots for all diet and lifestyle quality scores associated with 10-year risk of CVD mortality among 451,256 participants of the EPIC study.**

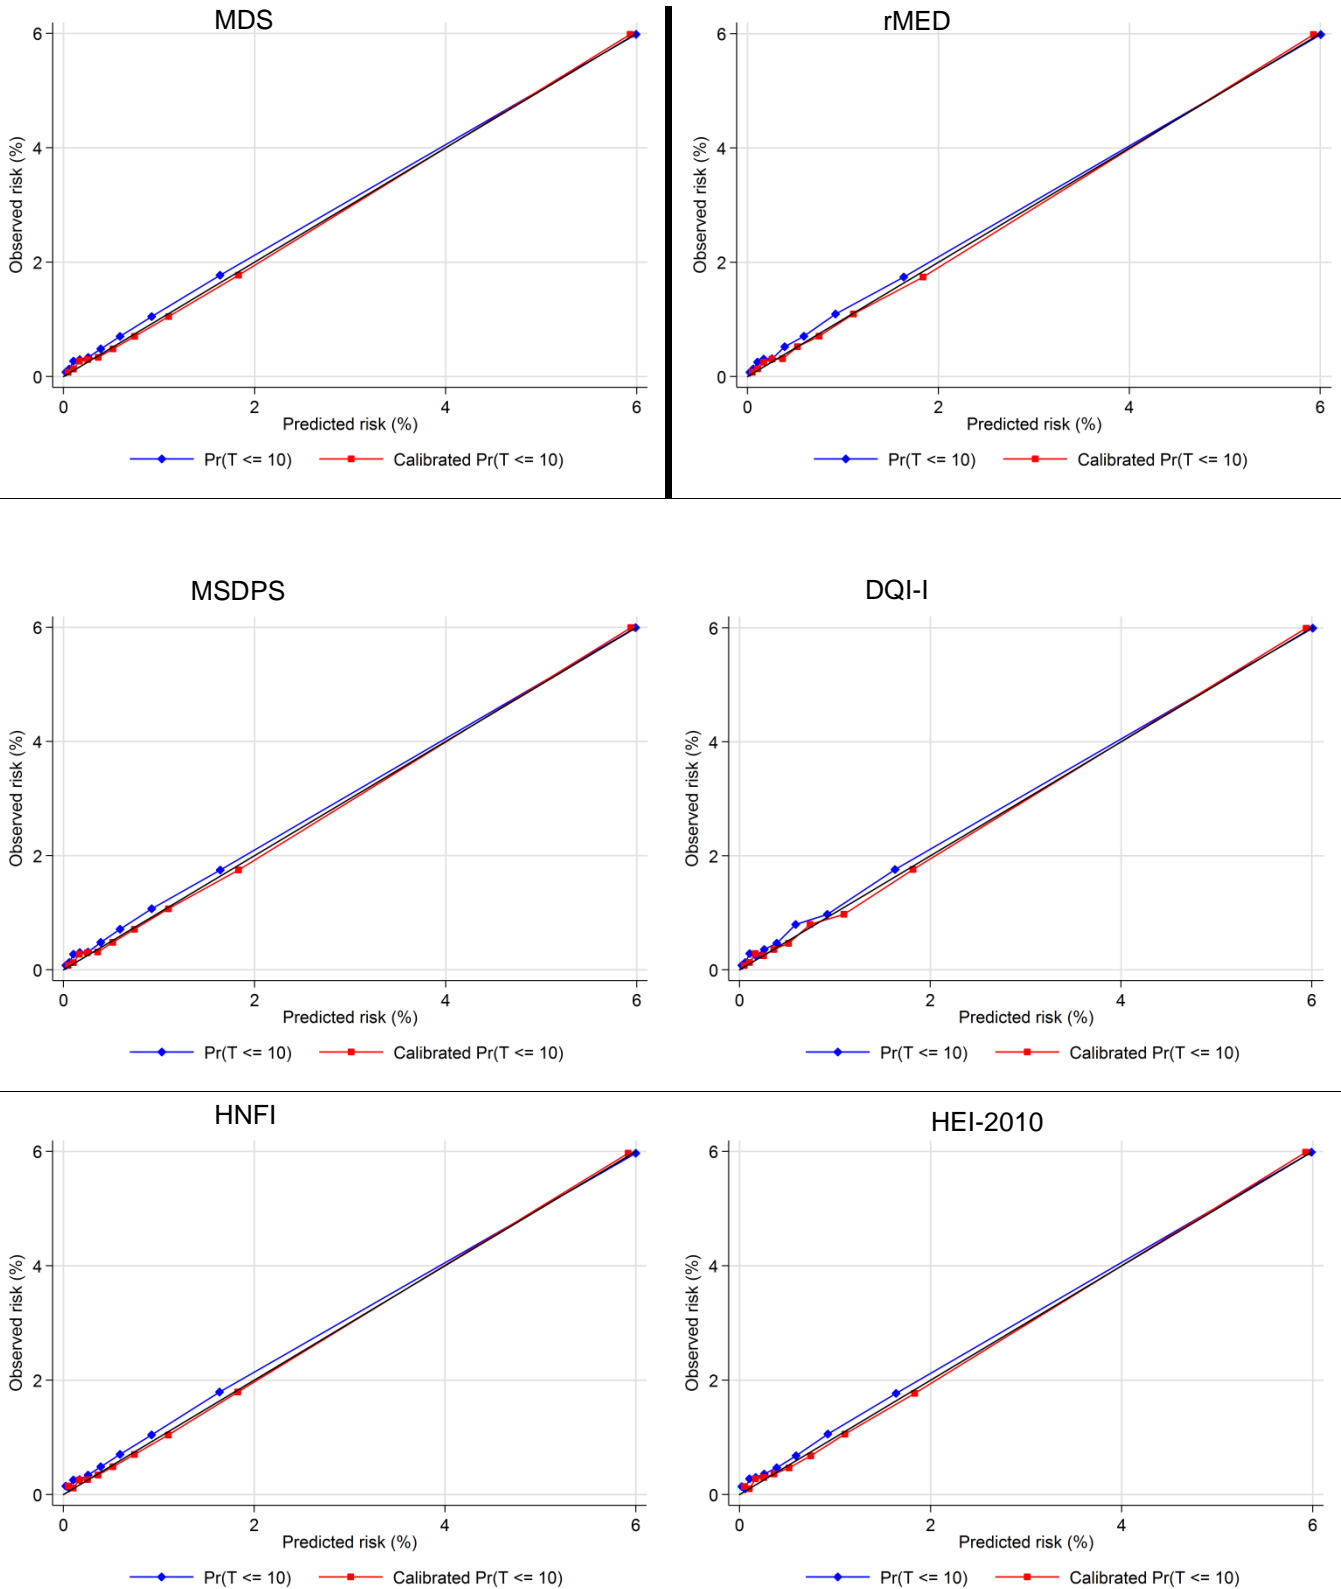

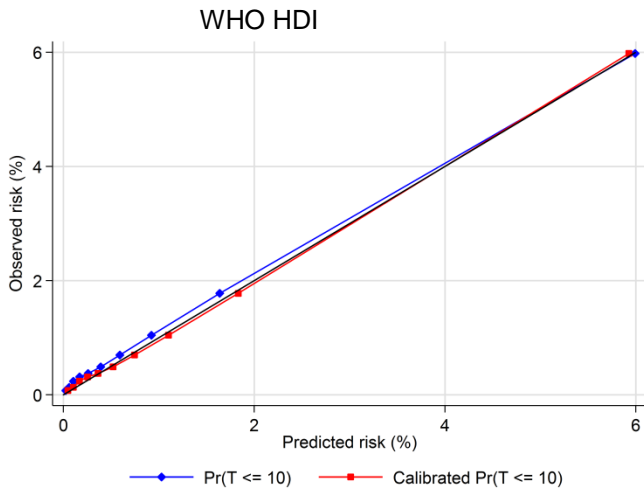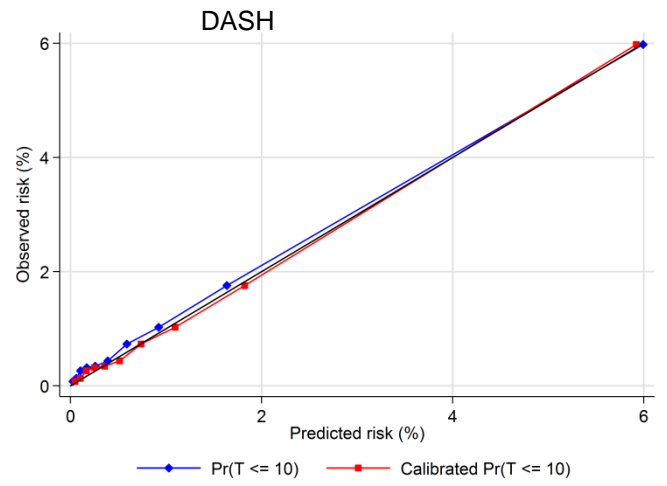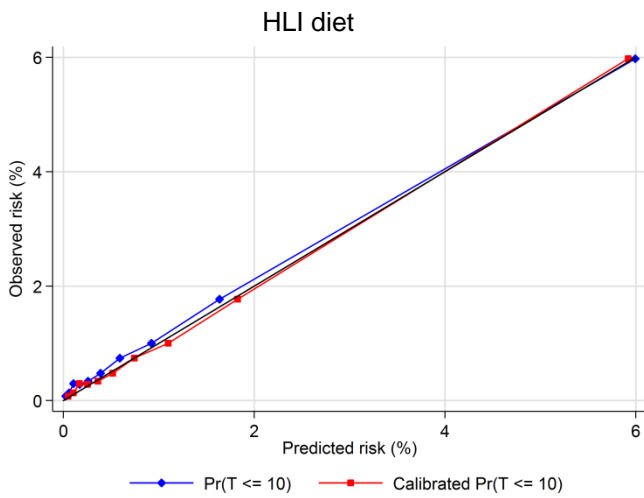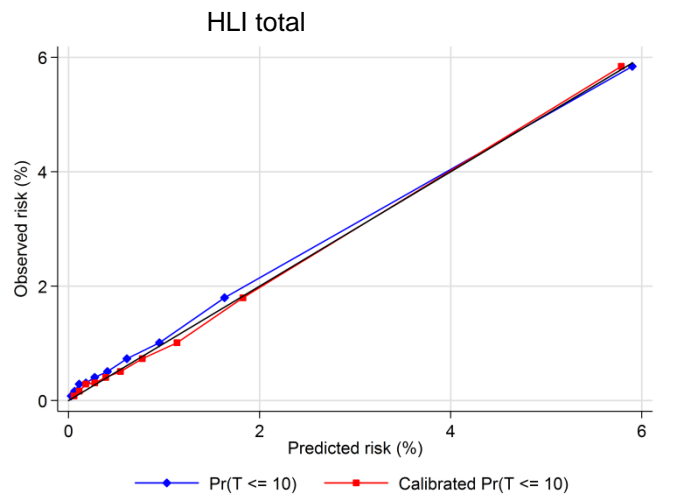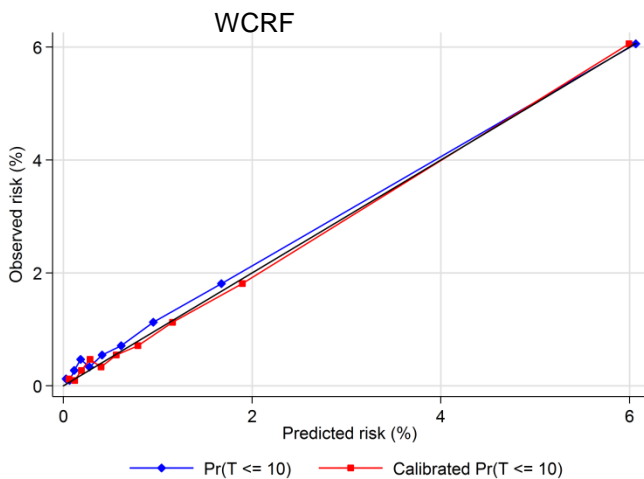

**S1c Fig. Calibration plots for all diet and lifestyle quality scores associated with 10-year risk of cancer mortality among 451,256 participants of the EPIC study.**

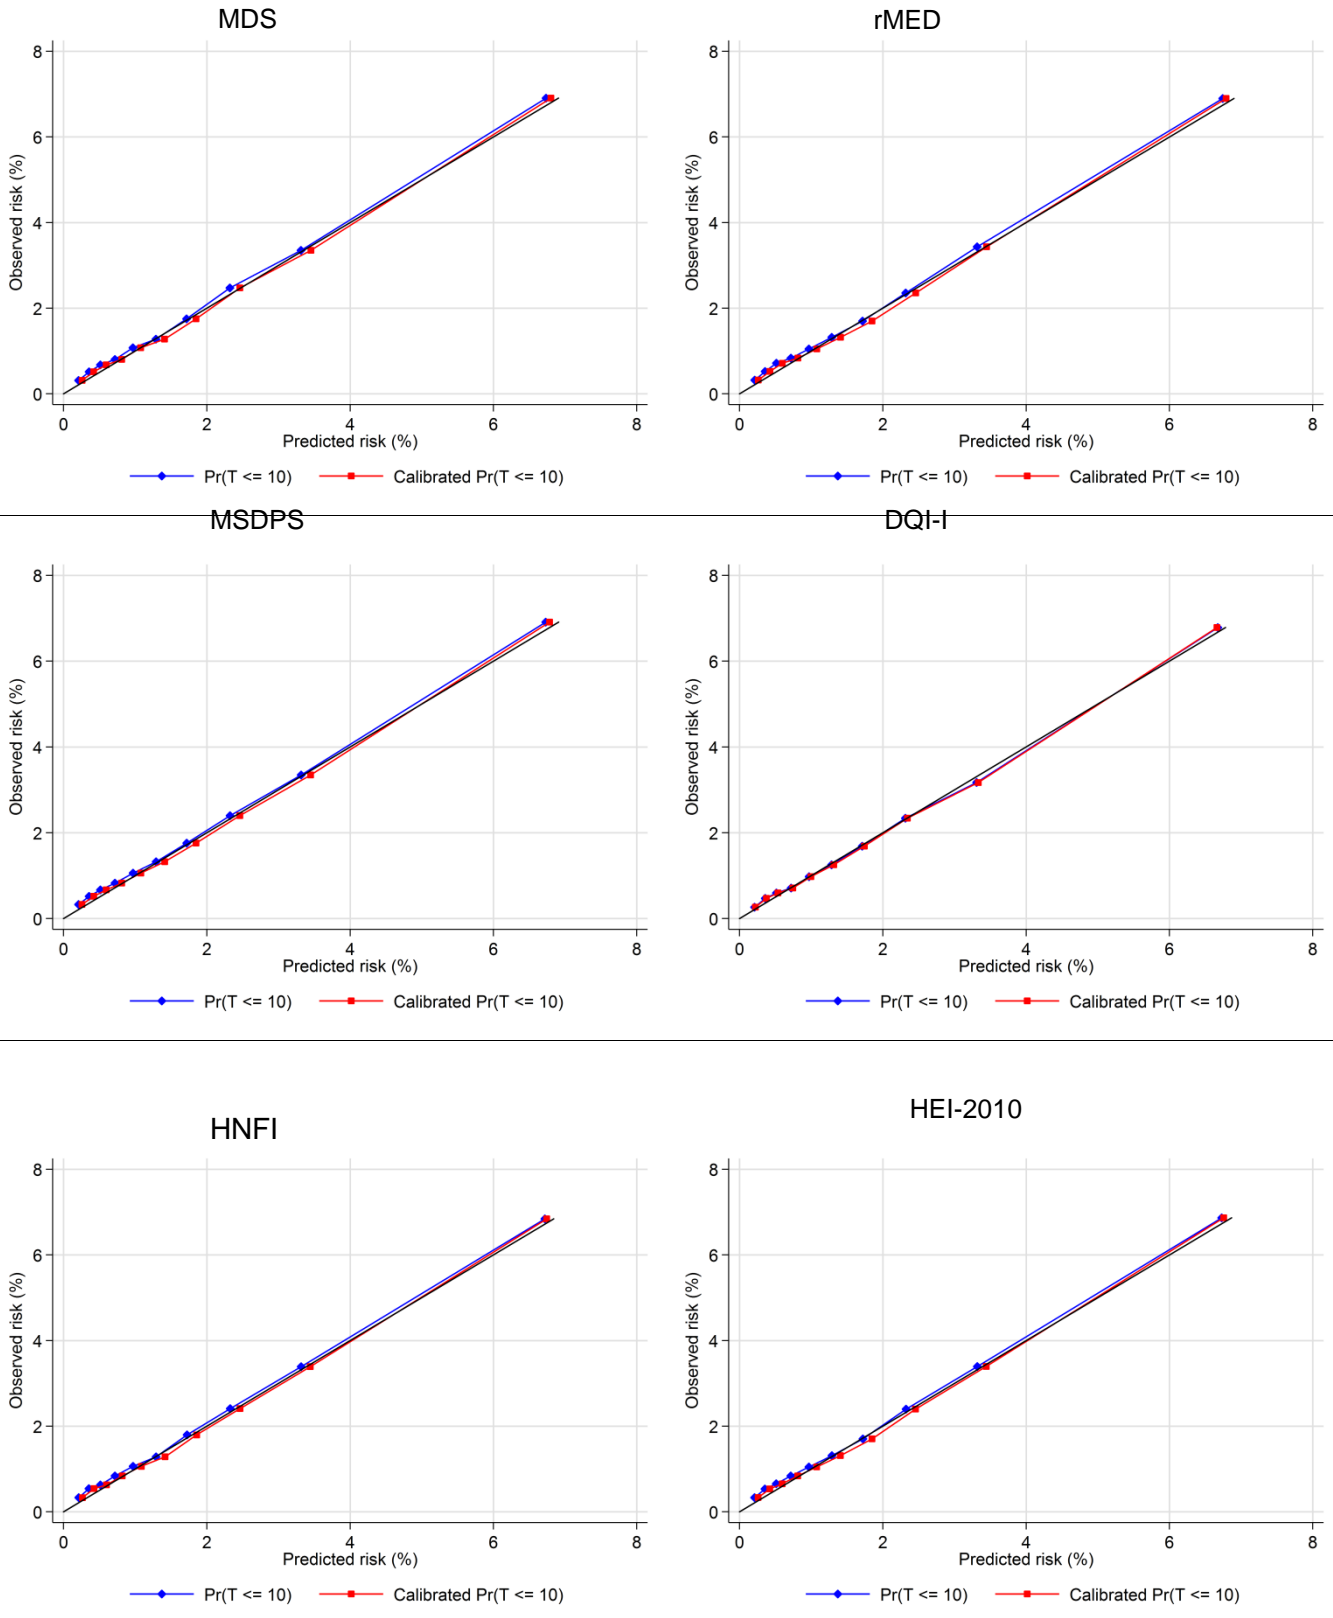

WHO HDI

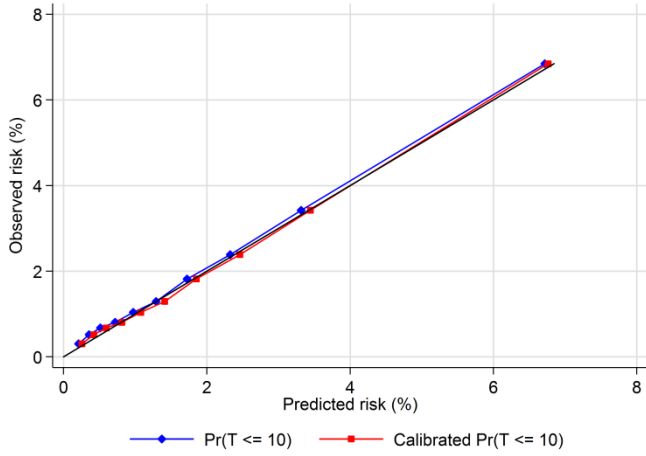

DASH

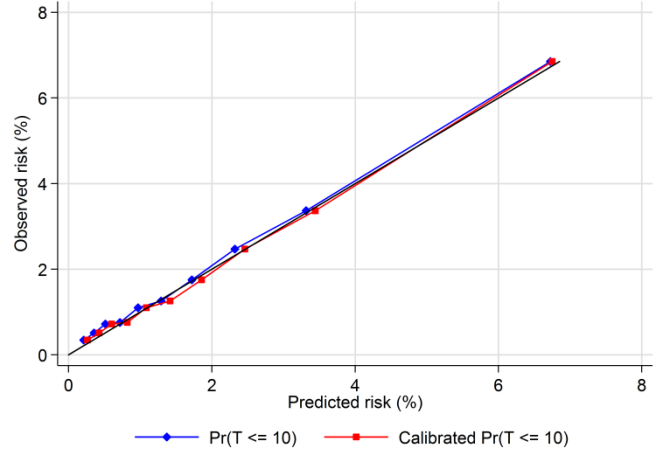

HLD-diet

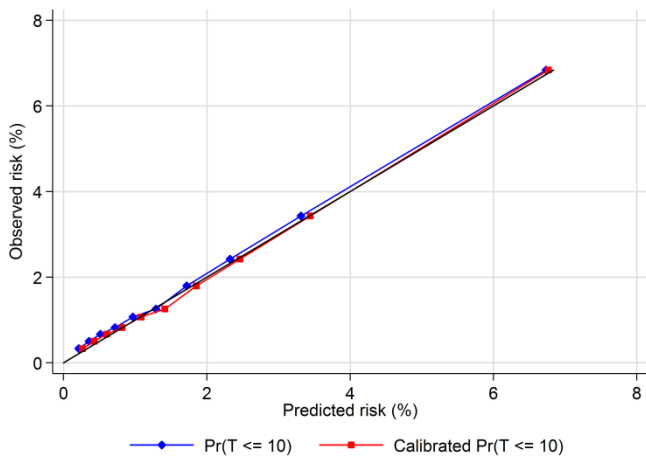

HLD-total

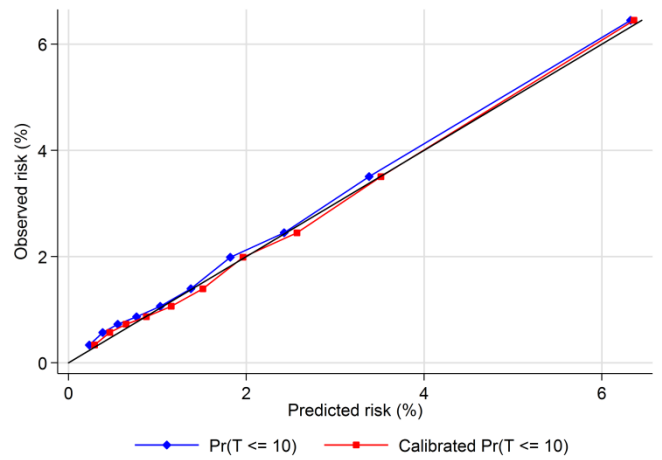

WCRF

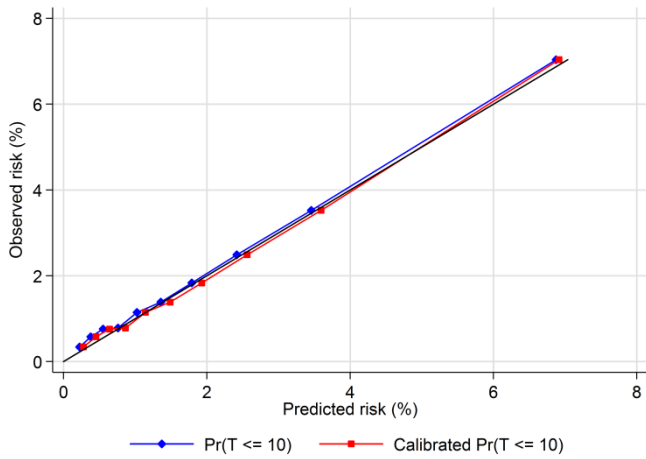

**S1d Fig. Calibration table and predicted/observed risk for DQI-I associated with 10-year risk of all-cause mortality**

| Decile of predicted risk | Predicted risk (%) | Observed risk (%) | Number of events at 10 years | Pred/Obs ratio |
|--------------------------|--------------------|-------------------|------------------------------|----------------|
| 1                        | 0.32               | 0.54              | 194                          | 0.59           |
| 2                        | 0.63               | 0.91              | 362                          | 0.69           |
| 3                        | 0.91               | 1.13              | 453                          | 0.81           |
| 4                        | 1.26               | 1.39              | 569                          | 0.9            |
| 5                        | 1.68               | 1.75              | 736                          | 0.96           |
| 6                        | 2.23               | 2.16              | 916                          | 1.03           |
| 7                        | 2.99               | 2.88              | 1237                         | 1.04           |
| 8                        | 4.14               | 4.05              | 1769                         | 1.02           |
| 9                        | 6.20               | 6.10              | 2665                         | 1.02           |
| 10                       | 14.55              | 14.96             | 6299                         | 0.97           |

Mean Predicted/Observed ratio = 0.97

Calibration slope = 0.99
