# Supplementary material for: Diet Quality Scores and Prediction of All-Cause, Cardiovascular and Cancer Mortality in a Pan-European Cohort Study
Source: PubMed Central journal article supplement (PMC4943719; doi:10.1371/journal.pone.0159025), 2016-07-13

**S3a Fig. Discrimination (Harrell's C statistic) of diet/lifestyle quality scores in Model 2 for 10-year risk of all-cause mortality among 451,256 participants to the EPIC study, by country.**

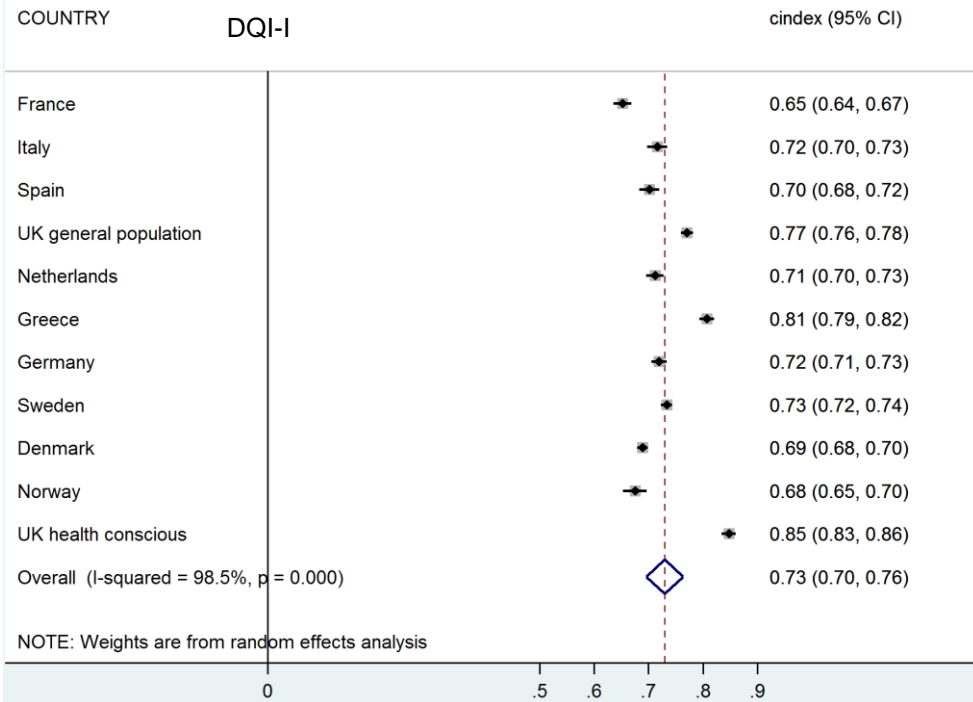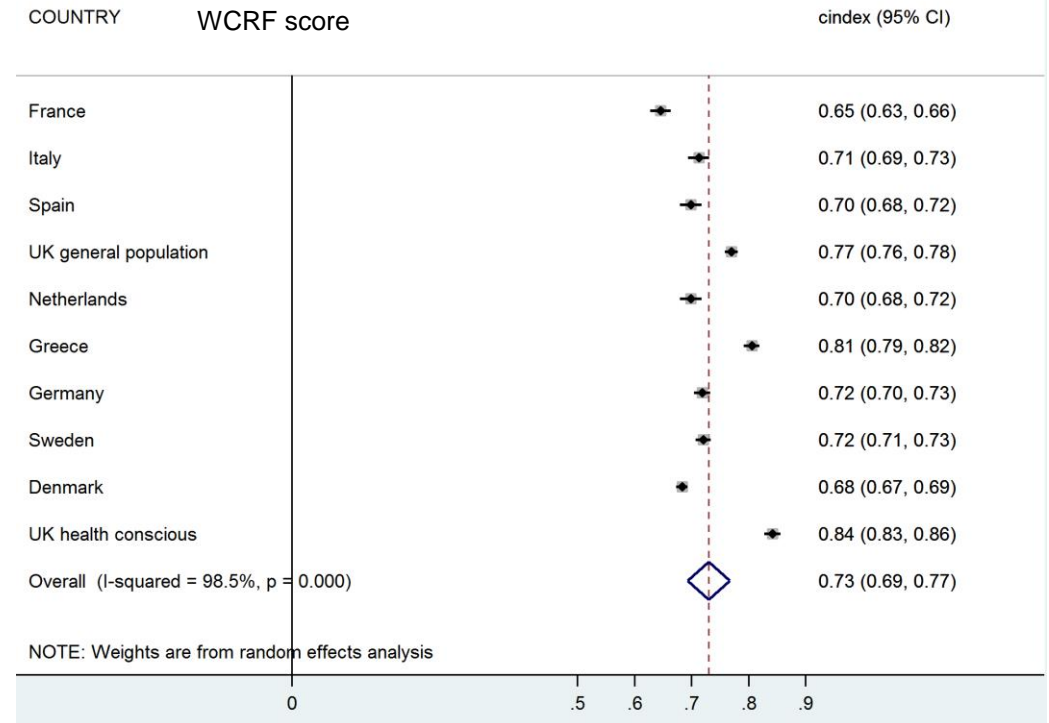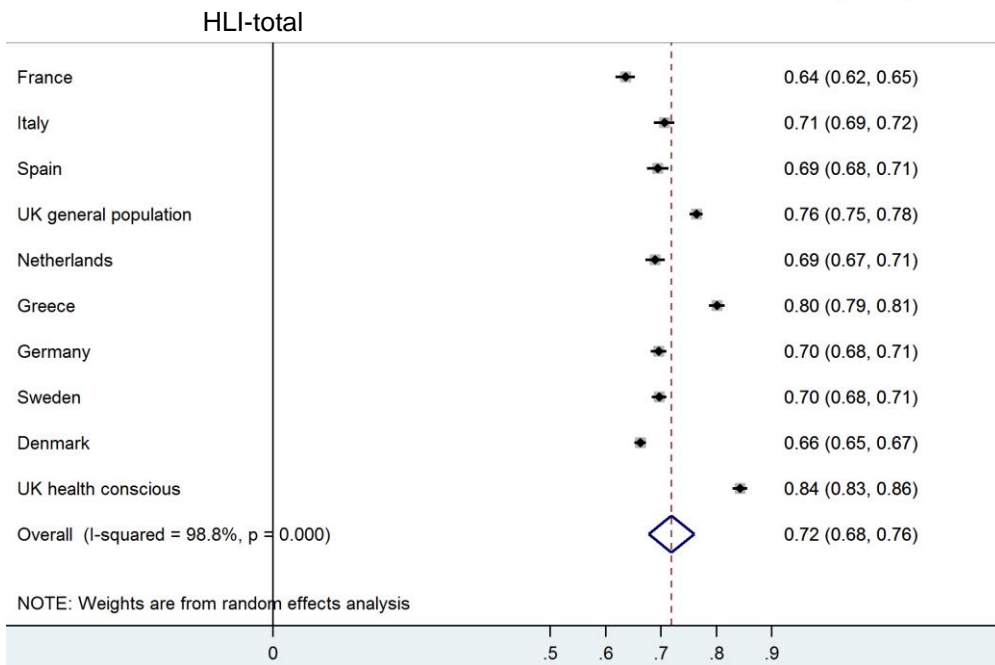

**S3b Fig. Discrimination (Harrell's C statistic) of diet/lifestyle quality scores in Model 2 for 10-year risk of CVD mortality among 451,256 participants to the EPIC study, by country.**

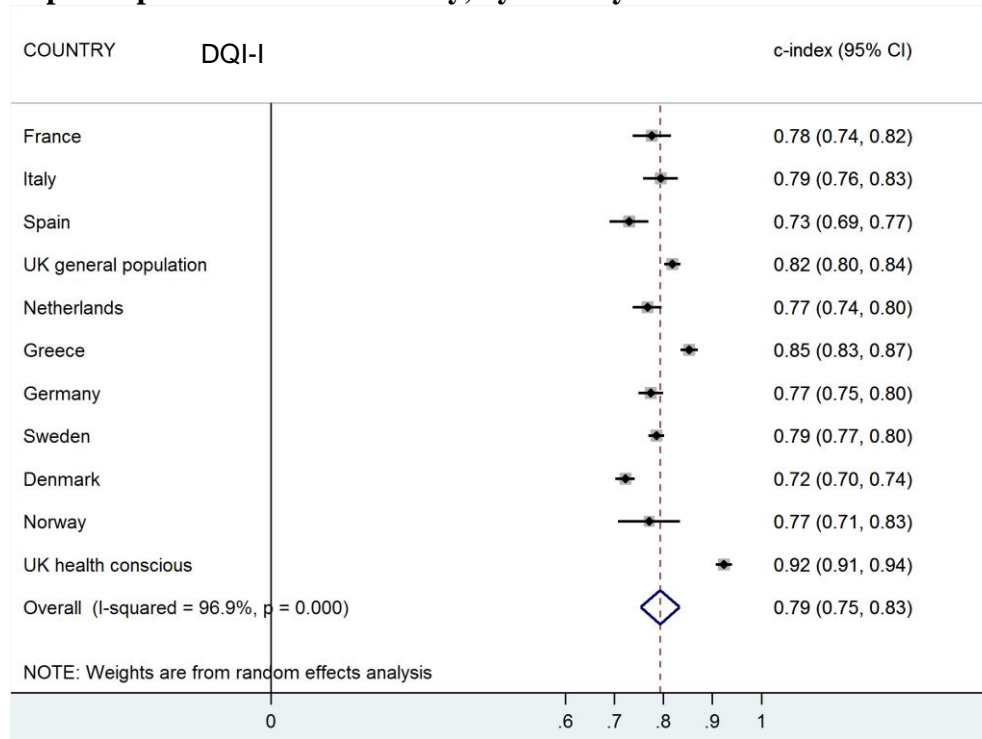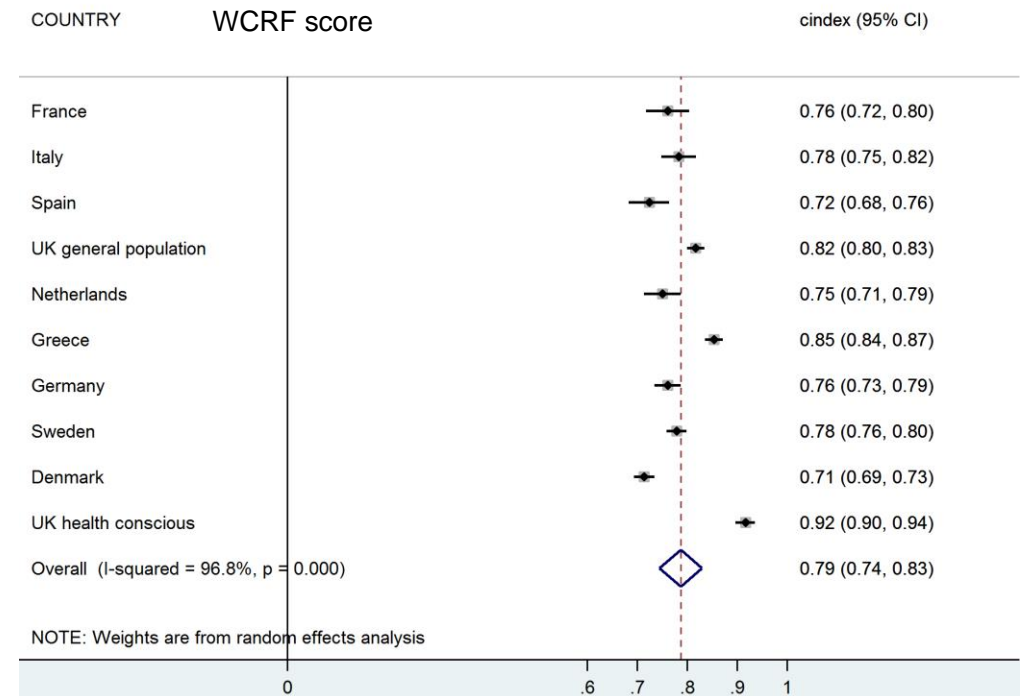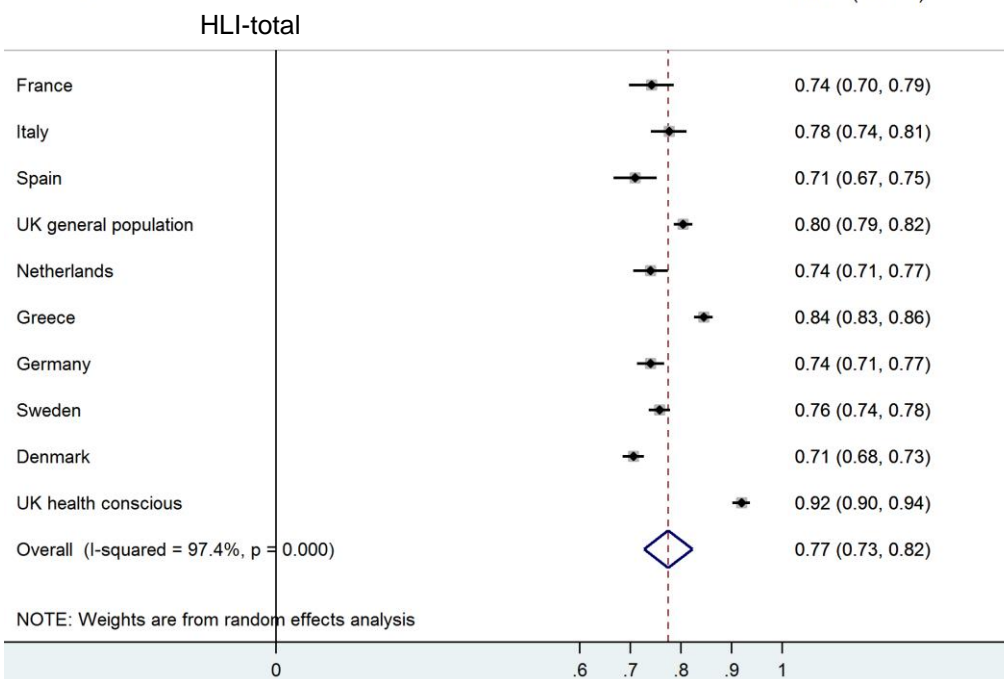

**S3c Fig. Discrimination (Harrell's C statistic) of diet/lifestyle quality scores in Model 2 for 10-year risk of cancer mortality among 451,256 participants to the EPIC study, by country**

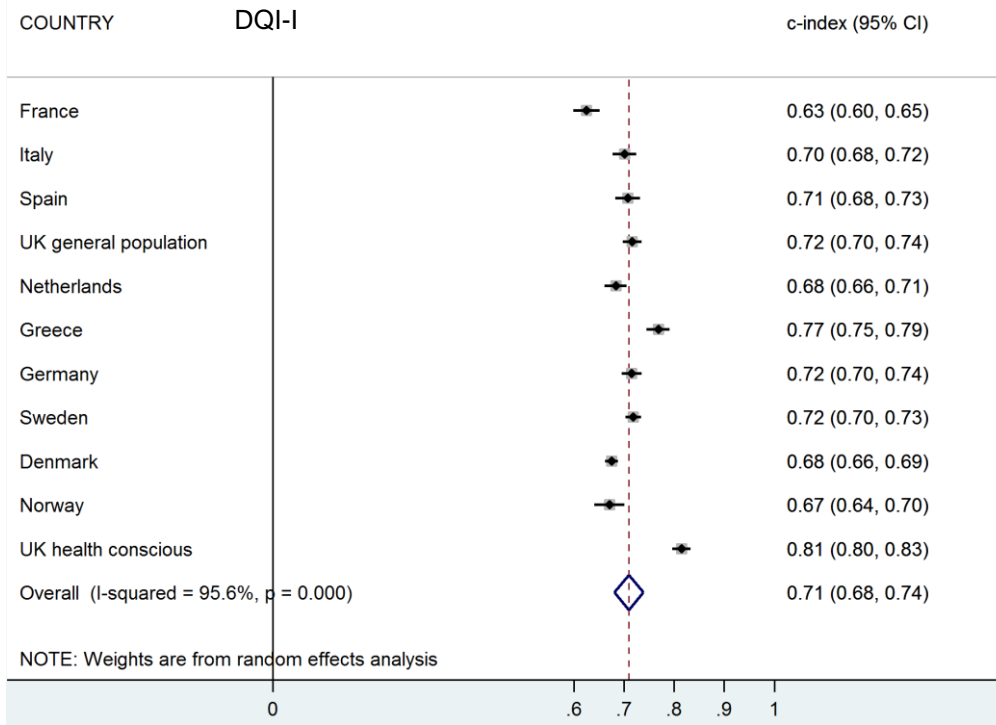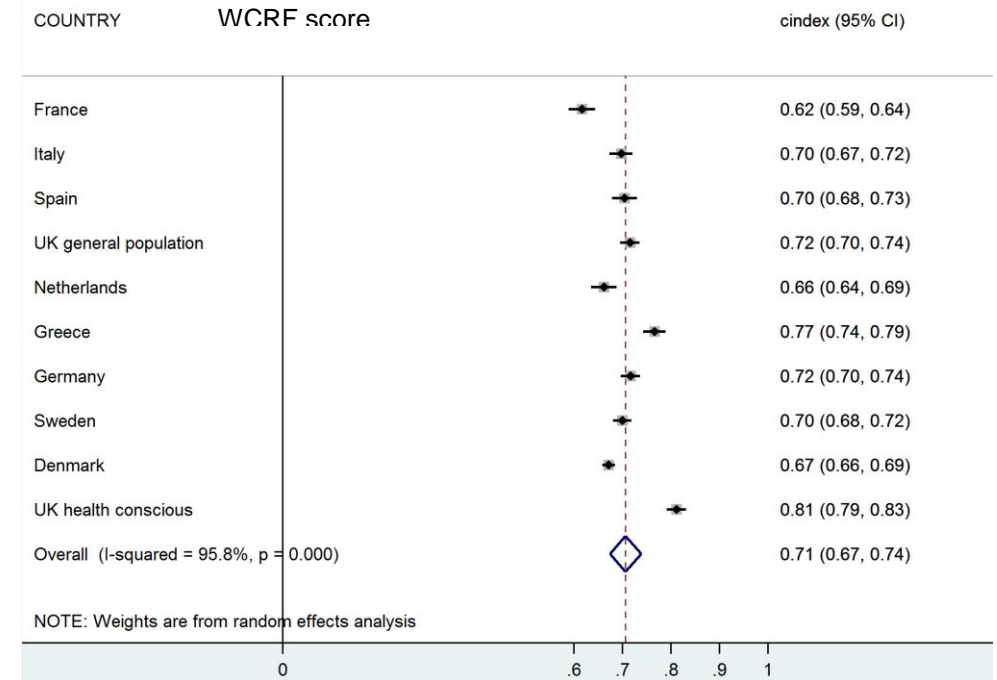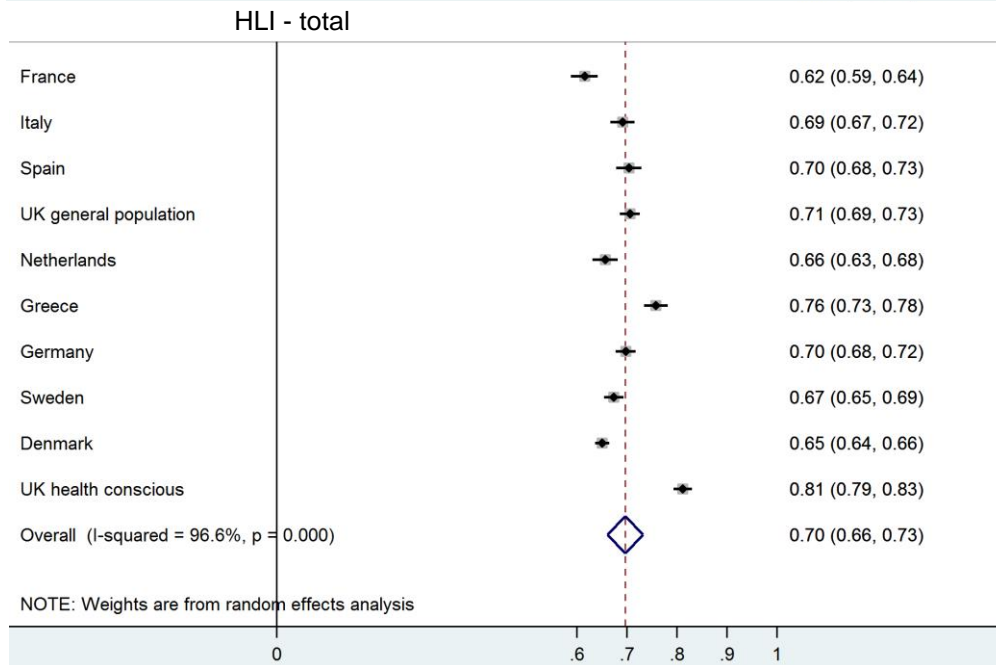

Supplement: pone.0159025.s003.pdf [file pone.0159025.s003.pdf]
