# Supplementary material for: Diet Quality Scores and Prediction of All-Cause, Cardiovascular and Cancer Mortality in a Pan-European Cohort Study
Source: PubMed Central journal article supplement (PMC4943719; doi:10.1371/journal.pone.0159025), 2016-07-13

S4a Fig. C statistic of the baseline model <sup>a</sup>, Model 1 <sup>b</sup> and Model 2 <sup>c</sup> in 451,256 participants to the EPIC study, by sex.

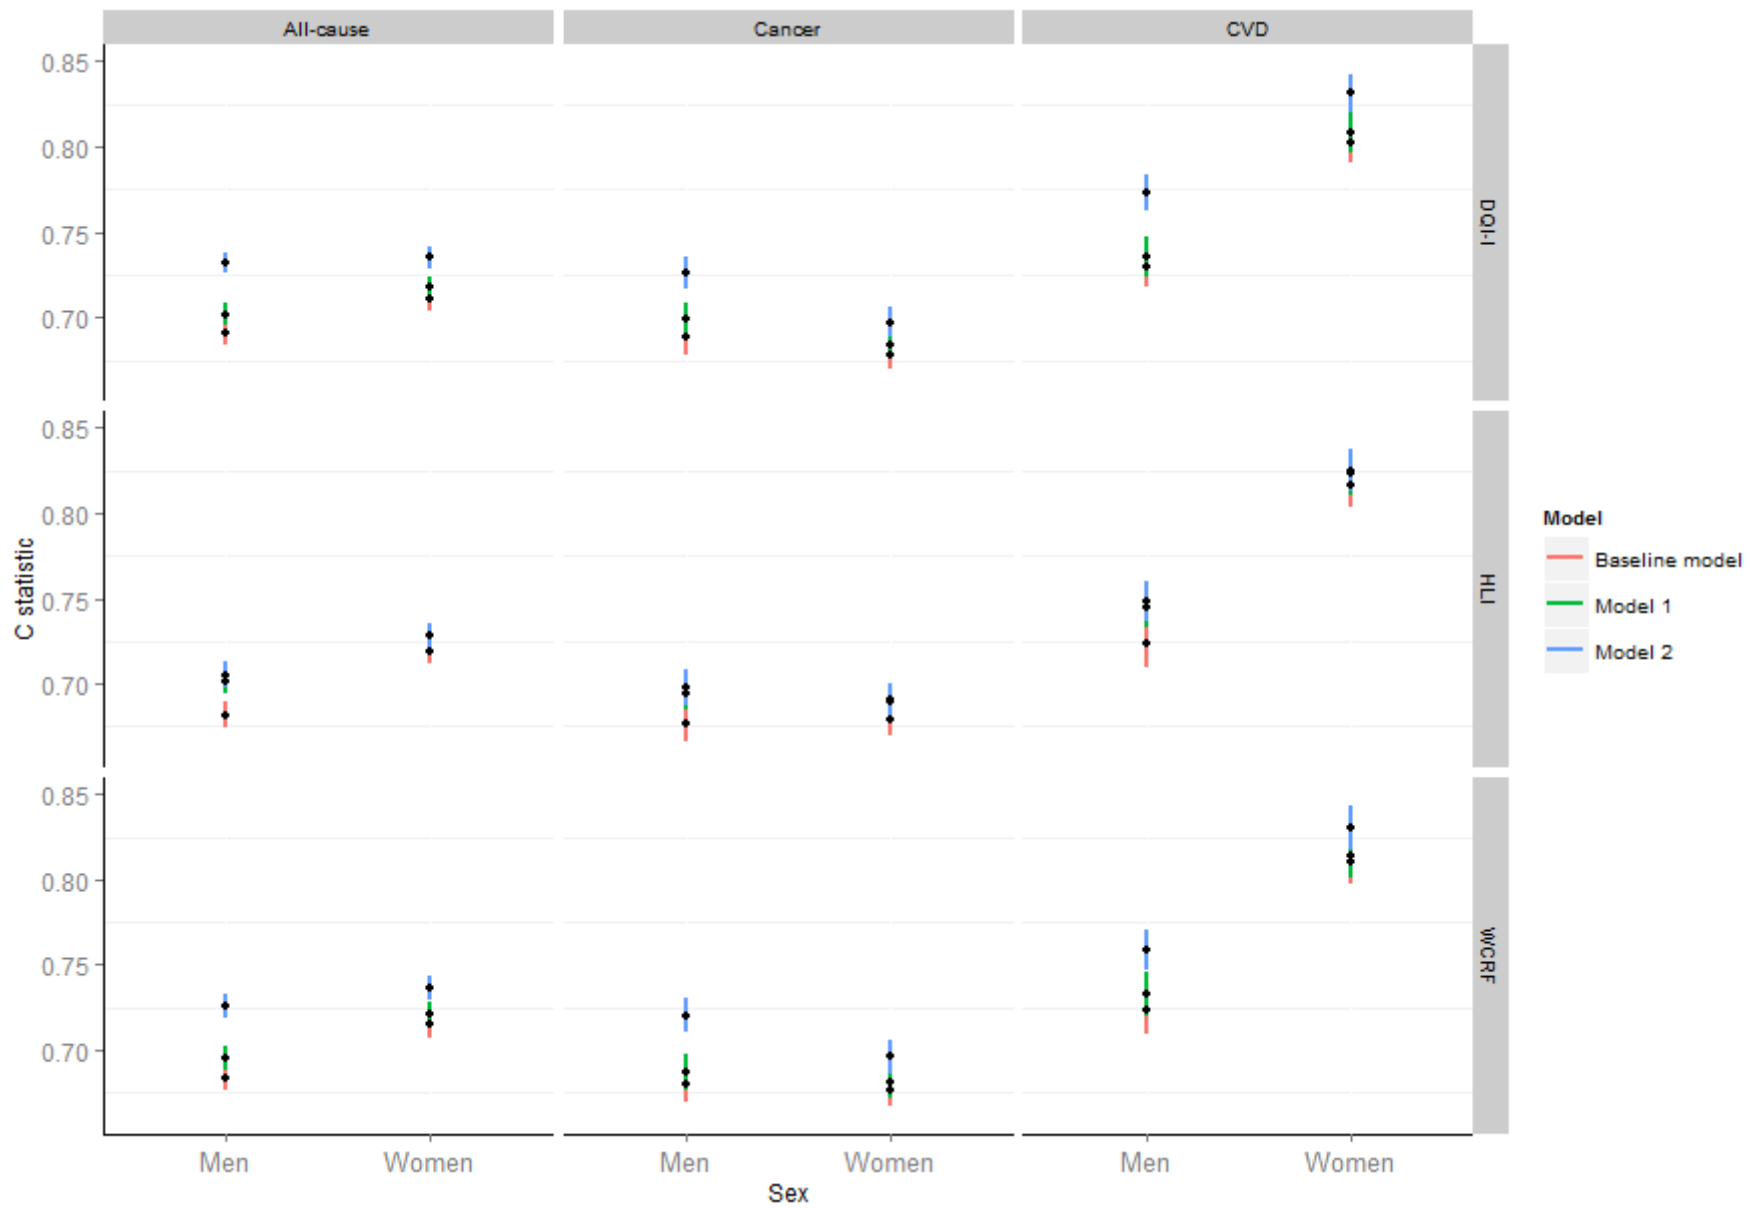

S4b Fig. C statistic of the baseline model <sup>a</sup>, Model 1 <sup>b</sup> and Model 2 <sup>c</sup> in 451,256 participants to the EPIC study, by age.

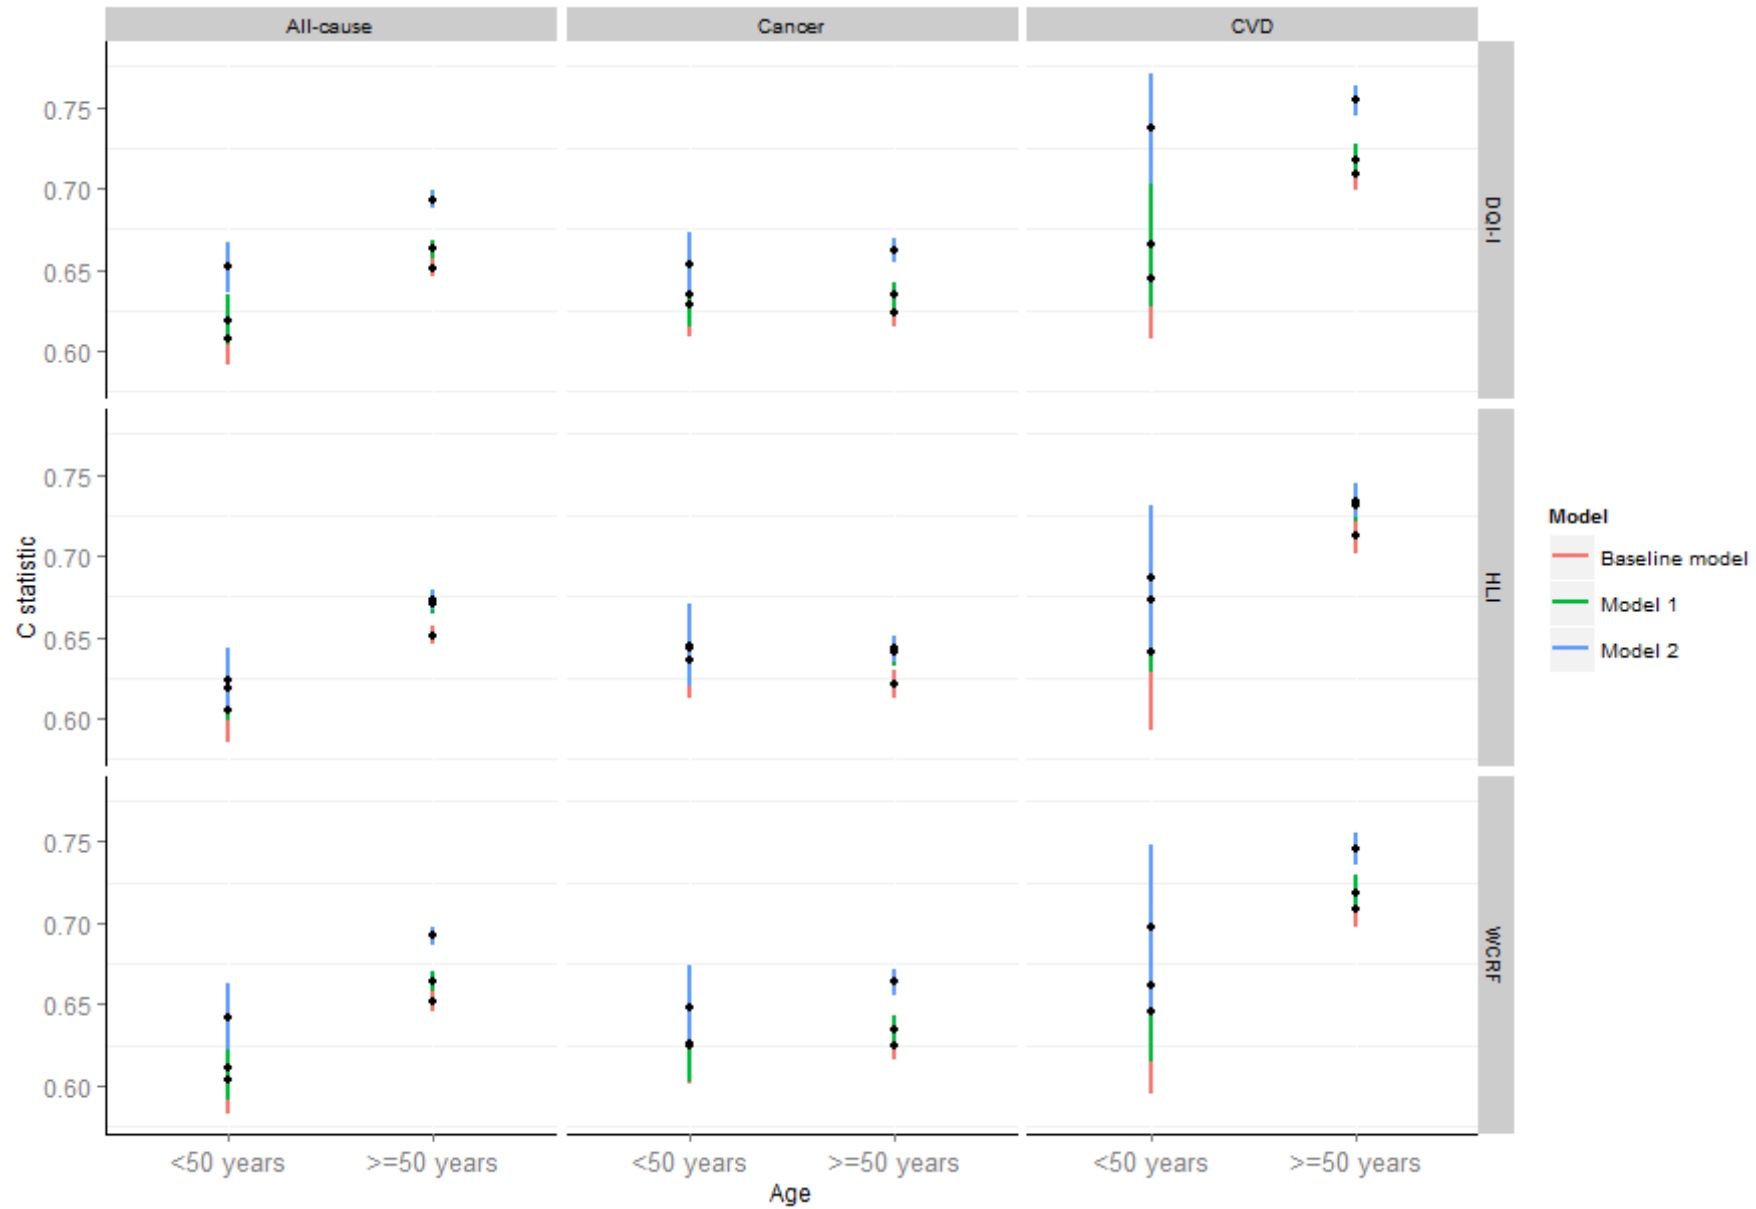

Supplement: pone.0159025.s004.pdf [file pone.0159025.s004.pdf]
