# Supplementary material for: Diet Quality Scores and Prediction of All-Cause, Cardiovascular and Cancer Mortality in a Pan-European Cohort Study
Source: PubMed Central journal article supplement (PMC4943719; doi:10.1371/journal.pone.0159025), 2016-07-13
Supplement: pone.0159025.s006.pdf [file pone.0159025.s006.pdf]

**S1 Table. Description of the food and nutrient components used for the calculation of the 11 dietary scores**

|                                             | MDS | rMED | MSDPS    | HEI2010 | DQI-I | DASH        | HNFI                | WHO<br>HDI | HLI-diet  | WCRF |
|---------------------------------------------|-----|------|----------|---------|-------|-------------|---------------------|------------|-----------|------|
| <b>Food</b>                                 |     |      |          |         |       |             |                     |            |           |      |
| Alcohol                                     | +   | +    | + (wine) |         |       |             |                     |            |           | -    |
| Dairy                                       | -   | -    | -        |         |       | + (low-fat) |                     |            |           |      |
| Egg                                         |     |      | -        |         |       |             |                     |            |           |      |
| Empty calorie food                          |     |      |          | -       | -     |             |                     |            |           | -    |
| Fish                                        | +   | +    | +        | +       |       |             | +                   |            | + (fatty) |      |
| Fruit                                       | +   | +    | +        | +       | +     | +           | + (apples<br>pears) | +          | +         | +    |
| Grains                                      | +   | +    |          |         | +     |             |                     |            |           |      |
| Refined                                     |     |      |          | -       |       |             |                     |            |           |      |
| Whole                                       |     |      | +        | +       |       | +           | + (rye bread)       |            |           |      |
| Legumes                                     | +   | +    | +        | +       |       | +           |                     |            |           |      |
| Nuts                                        |     |      | +        |         |       | +           |                     |            |           |      |
| Olive oil                                   |     | +    | +        |         |       |             |                     |            |           |      |
| Meat                                        |     |      | -        |         |       | -           |                     |            |           |      |
| Poultry                                     |     |      | +        |         |       |             |                     |            |           |      |
| Red and processed                           | -   | -    |          |         |       |             |                     |            |           | -    |
| Potatoes                                    |     |      | -        |         |       |             |                     |            |           |      |
| Sugar sweetened beverages<br>sweet products |     |      | -        |         |       | -           |                     |            |           | -    |
| Total protein foods                         |     |      |          | +       |       |             |                     |            |           |      |
| Vegetables (excluding potatoes)             | +   | +    | +        | +       | +     | +           | + (root)            | +          | +         | +    |
| Variety                                     |     |      |          |         | +     |             |                     |            |           |      |
| <b>Nutrients</b>                            |     |      |          |         |       |             |                     |            |           |      |
| Dietary fibre                               |     |      |          |         | +     |             |                     | +          | +         | +    |
| Protein                                     |     |      |          |         | +     |             |                     | +          |           |      |

|               |   |   |   |   |
|---------------|---|---|---|---|
| Fat           |   | - |   |   |
| PUFA          |   | + | + | + |
| MUFA          | + | + |   |   |
| SFA           | - | - | - | - |
| Cholesterol   |   | - | - |   |
| Trans-fat     |   |   |   | - |
| Free sugars   |   |   | - |   |
| Glycemic load |   |   |   | - |
| Iron          |   | + |   |   |
| Calcium       |   | + |   |   |
| Potassium     |   |   |   |   |
| Magnesium     |   |   |   |   |
| Vitamin C     |   | + |   |   |
| Folate        |   |   |   | + |
| Sodium        |   | - | - | - |

+ indicates positive weighting (encourages consumption)

- indicates negative weighting (limits consumption)

**Abbreviations:** MDS, Mediterranean Diet Scale; rMED, relative Mediterranean diet score; MSDPS, Mediterranean Style Dietary Pattern Score; DQI-I, Diet Quality Index – International; HNFI, Healthy Nordic Food Index; HEI-2010, Healthy Eating Index 2010; WHO HDI, World Health Organization Healthy Diet Index; DASH, Dietary Approach to Stop Hypertension; HLI, Healthy Lifestyle Index; HLI-diet, diet component of the HLI; WCRF, World Cancer Research Fund / American Institute for Cancer Research
