# Supplementary material for: Diet Quality Scores and Prediction of All-Cause, Cardiovascular and Cancer Mortality in a Pan-European Cohort Study
Source: PubMed Central journal article supplement (PMC4943719; doi:10.1371/journal.pone.0159025), 2016-07-13
Supplement: pone.0159025.s007.pdf [file pone.0159025.s007.pdf]

**S2 Table. Multivariate hazard ratios and C-statistic (Model 2<sup>a</sup>) for 10-year mortality risk due to obesity-related cancer for a 1SD increase of score among 451,256 participants of the EPIC study**

|                          | HR      | HR (95% CI)       | HR (95% CI)       | HR (95% CI)       | HR (95% CI)             | P trend <sup>c</sup> | C-statistic           |
|--------------------------|---------|-------------------|-------------------|-------------------|-------------------------|----------------------|-----------------------|
|                          | Q1      | Q2                | Q3                | Q4                | Continuous <sup>b</sup> |                      |                       |
| MDS                      | 1 (ref) | 0.91( 0.82- 1.00) | 0.91( 0.82- 1.00) | 0.87( 0.79- 0.97) | 0.95 (0.92 - 0.99)      | 0.51                 | 0.690 (0.679 - 0.701) |
| rMED                     | 1 (ref) | 0.96( 0.87- 1.06) | 0.95( 0.86- 1.05) | 0.87( 0.78- 0.96) | 0.94 (0.90 - 0.97)      | 0.06                 | 0.690 (0.679 - 0.701) |
| MSDPS                    | 1 (ref) | 0.96( 0.87- 1.07) | 0.99( 0.89- 1.09) | 0.85( 0.76- 0.94) | 0.95 (0.91 - 0.99)      | 0.02                 | 0.690 (0.679 - 0.700) |
| DQI-I                    | 1 (ref) | 0.89( 0.80- 0.98) | 0.84( 0.76- 0.94) | 0.83( 0.75- 0.92) | 0.93 (0.90 - 0.97)      | 0.24                 | 0.690 (0.679 - 0.701) |
| HNDS                     | 1 (ref) | 0.97( 0.87- 1.07) | 0.87( 0.78- 0.97) | 0.85( 0.76- 0.95) | 0.94 (0.90 - 0.98)      | 0.02                 | 0.690 (0.679 - 0.701) |
| HEI 2010                 | 1 (ref) | 0.92( 0.83- 1.02) | 0.85( 0.77- 0.95) | 0.90( 0.81- 0.99) | 0.94 (0.90 - 0.97)      | 0.57                 | 0.690 (0.679 - 0.700) |
| WHO HDI                  | 1 (ref) | 0.99( 0.89- 1.10) | 0.93( 0.83- 1.04) | 0.94( 0.84- 1.05) | 0.98 (0.94 - 1.02)      | 0.33                 | 0.689 (0.678 - 0.700) |
| DASH                     | 1 (ref) | 0.97( 0.87- 1.07) | 0.94( 0.84- 1.04) | 0.93( 0.84- 1.04) | 0.95 (0.92 - 0.99)      | 0.51                 | 0.689 (0.678 - 0.700) |
| HLI – diet               | 1 (ref) | 0.90( 0.81- 0.99) | 0.87( 0.78- 0.96) | 0.88( 0.79- 0.98) | 0.95 (0.91 - 0.99)      | 0.74                 | 0.690 (0.679 - 0.700) |
| HLI - total <sup>d</sup> | 1 (ref) | 0.81( 0.73- 0.91) | 0.76( 0.68- 0.85) | 0.62( 0.55- 0.70) | 0.83 (0.79 - 0.86)      | <0.0001              | 0.682 (0.670 - 0.694) |
| WCRF <sup>e</sup>        | 1 (ref) | 0.85( 0.76- 0.94) | 0.76( 0.68- 0.85) | 0.72( 0.64- 0.80) | 0.88 (0.84 - 0.91)      | 0.004                | 0.682 (0.671 - 0.694) |

**Abbreviations:** MDS, Mediterranean Diet Scale; rMED, relative Mediterranean diet score; MSDPS, Mediterranean Style Dietary Pattern Score; DQI-I, Diet Quality Index – International; HNFI, Healthy Nordic Food Index; HEI-2010, Healthy Eating Index 2010; WHO HDI, World Health Organization Healthy Diet Index; DASH, Dietary Approach to Stop Hypertension; HLI, Healthy Lifestyle Index; HLI-diet, diet component of the HLI; WCRF, World Cancer Research Fund / American Institute for Cancer Research

<sup>a</sup> Model including the following predictors: age at baseline, Physical activity (Cambridge index), smoking status (3 categories) and educational level, unless otherwise stated. Stratified by study center and sex.

<sup>b</sup> HR for the increase of 1 SD of score

<sup>c</sup> p-value for linear trend across quartiles

<sup>d</sup> Model only including HLI, age and educational level because BMI, physical activity, smoking are components of the Healthy Lifestyle Index, n=376,553

<sup>e</sup> Model only including WCRF score, smoking and educational level as BMI and physical activity are components of the WCRF score, n=363,207
