# Supplementary material for: Diet Quality Scores and Prediction of All-Cause, Cardiovascular and Cancer Mortality in a Pan-European Cohort Study
Source: PubMed Central journal article supplement (PMC4943719; doi:10.1371/journal.pone.0159025), 2016-07-13
Supplement: pone.0159025.s008.pdf [file pone.0159025.s008.pdf]

**S3 Table. Multivariate hazard ratios adjusted for total energy intake a for 10-year mortality risk by quartile of score and for a 1SD increase of score among 451,256 participants of the EPIC study**

|                          | HR      | HR (95% CI)       | HR (95% CI)       | HR (95% CI)       | HR (95% CI)             | P-trend <sup>c</sup> |
|--------------------------|---------|-------------------|-------------------|-------------------|-------------------------|----------------------|
| All-cause mortality      | Q1      | Q2                | Q3                | Q4                | Continuous <sup>b</sup> |                      |
| MDS                      | 1 (ref) | 0.89 (0.86- 0.93) | 0.84 (0.80- 0.87) | 0.78 (0.74- 0.82) | 0.91 (0.89 - 0.92)      | <0.0001              |
| rMED                     | 1 (ref) | 0.87 (0.84- 0.91) | 0.81 (0.77- 0.85) | 0.77 (0.74- 0.81) | 0.89 (0.88 - 0.91)      | <0.0001              |
| MSDPS                    | 1 (ref) | 0.92 (0.88- 0.96) | 0.87 (0.84- 0.91) | 0.79 (0.76- 0.83) | 0.91 (0.90 - 0.93)      | <0.0001              |
| DQI-I                    | 1 (ref) | 0.88 (0.84- 0.92) | 0.79 (0.76- 0.83) | 0.74 (0.71- 0.77) | 0.89 (0.87 - 0.90)      | <0.0001              |
| HNFI                     | 1 (ref) | 0.93 (0.89- 0.97) | 0.85 (0.82- 0.89) | 0.80 (0.77- 0.84) | 0.92 (0.91 - 0.94)      | <0.0001              |
| HEI 2010                 | 1 (ref) | 0.89 (0.85- 0.93) | 0.84 (0.80- 0.88) | 0.81 (0.78- 0.85) | 0.91 (0.90 - 0.93)      | 0.0001               |
| WHO HDI                  | 1 (ref) | 0.93 (0.89- 0.98) | 0.88 (0.84- 0.92) | 0.87 (0.83- 0.92) | 0.95 (0.94 - 0.97)      | 0.005                |
| DASH                     | 1 (ref) | 0.90 (0.86- 0.94) | 0.84 (0.80- 0.87) | 0.80 (0.76- 0.83) | 0.91 (0.89 - 0.92)      | <0.0001              |
| HLI – diet               | 1 (ref) | 0.91 (0.87- 0.95) | 0.85 (0.81- 0.89) | 0.82 (0.78- 0.85) | 0.93 (0.91 - 0.94)      | <0.0001              |
| HLI - total <sup>d</sup> | 1 (ref) | 0.75 (0.72- 0.78) | 0.65 (0.62- 0.68) | 0.55 (0.52- 0.57) | 0.79 (0.77 - 0.80)      | <0.0001              |
| WCRF <sup>e</sup>        | 1 (ref) | 0.87 (0.83- 0.91) | 0.78 (0.74- 0.82) | 0.70 (0.67- 0.74) | 0.86 (0.85 - 0.88)      | <0.0001              |
| <b>CVD mortality</b>     |         |                   |                   |                   |                         |                      |
| MDS                      | 1 (ref) | 0.81 (0.74- 0.88) | 0.80 (0.73- 0.87) | 0.80 (0.72- 0.88) | 0.91 (0.88 - 0.94)      | 0.76                 |
| rMED                     | 1 (ref) | 0.88 (0.81- 0.96) | 0.80 (0.73- 0.88) | 0.77 (0.70- 0.85) | 0.89 (0.86 - 0.92)      | 0.01                 |
| MSDPS                    | 1 (ref) | 0.93 (0.85- 1.01) | 0.90 (0.83- 0.99) | 0.81 (0.73- 0.89) | 0.92 (0.89 - 0.95)      | 0.004                |
| DQI-I                    | 1 (ref) | 0.90 (0.83- 0.98) | 0.80 (0.73- 0.87) | 0.75 (0.68- 0.83) | 0.89 (0.87 - 0.92)      | 0.0002               |
| HNFI                     | 1 (ref) | 0.91 (0.83- 0.99) | 0.88 (0.80- 0.96) | 0.81 (0.73- 0.89) | 0.93 (0.90 - 0.96)      | 0.02                 |
| HEI 2010                 | 1 (ref) | 0.89 (0.82- 0.97) | 0.85 (0.78- 0.93) | 0.82 (0.75- 0.90) | 0.93 (0.90 - 0.96)      | 0.10                 |
| WHO HDI                  | 1 (ref) | 0.95 (0.87- 1.04) | 0.88 (0.80- 0.96) | 0.84 (0.76- 0.92) | 0.93 (0.90 - 0.96)      | 0.01                 |
| DASH                     | 1 (ref) | 0.86 (0.79- 0.94) | 0.80 (0.74- 0.88) | 0.76 (0.69- 0.84) | 0.89 (0.86 - 0.92)      | 0.01                 |
| HLI – diet               | 1 (ref) | 0.93 (0.85- 1.01) | 0.84 (0.77- 0.92) | 0.78 (0.71- 0.86) | 0.91 (0.88 - 0.94)      | 0.0003               |
| HLI - total <sup>d</sup> | 1 (ref) | 0.72 (0.66- 0.78) | 0.59 (0.54- 0.65) | 0.47 (0.42- 0.52) | 0.74 (0.71 - 0.77)      | <0.0001              |
| WCRF <sup>e</sup>        | 1 (ref) | 0.81 (0.74- 0.88) | 0.76 (0.69- 0.83) | 0.63 (0.57- 0.70) | 0.83 (0.81 - 0.86)      | <0.0001              |
| <b>Cancer mortality</b>  |         |                   |                   |                   |                         |                      |
| MDS                      | 1 (ref) | 0.95 (0.89- 1.01) | 0.90 (0.85- 0.96) | 0.82 (0.76- 0.87) | 0.93 (0.90 - 0.95)      | <0.0001              |
| rMED                     | 1 (ref) | 0.92 (0.86- 0.97) | 0.86 (0.81- 0.92) | 0.82 (0.77- 0.88) | 0.92 (0.90 - 0.94)      | 0.002                |
| MSDPS                    | 1 (ref) | 0.96 (0.90- 1.02) | 0.92 (0.87- 0.98) | 0.83 (0.78- 0.89) | 0.94 (0.91 - 0.96)      | <0.0001              |
| DQI-I                    | 1 (ref) | 0.87 (0.82- 0.93) | 0.82 (0.77- 0.87) | 0.77 (0.72- 0.82) | 0.91 (0.89 - 0.93)      | 0.0002               |
| HNFI                     | 1 (ref) | 0.98 (0.92- 1.04) | 0.91 (0.85- 0.97) | 0.84 (0.79- 0.90) | 0.94 (0.92 - 0.96)      | <0.0001              |
| HEI 2010                 | 1 (ref) | 0.94 (0.88- 1.00) | 0.86 (0.81- 0.91) | 0.86 (0.81- 0.92) | 0.92 (0.90 - 0.94)      | 0.02                 |
| WHO HDI                  | 1 (ref) | 0.95 (0.89- 1.02) | 0.90 (0.84- 0.96) | 0.91 (0.85- 0.97) | 0.96 (0.94 - 0.99)      | 0.12                 |
| DASH                     | 1 (ref) | 0.94 (0.88- 1.00) | 0.93 (0.87- 0.99) | 0.85 (0.79- 0.91) | 0.93 (0.91 - 0.96)      | 0.005                |
| HLI – diet               | 1 (ref) | 0.91 (0.85- 0.96) | 0.88 (0.82- 0.93) | 0.85 (0.79- 0.91) | 0.94 (0.92 - 0.96)      | 0.06                 |
| HLI - total <sup>d</sup> | 1 (ref) | 0.75 (0.70- 0.80) | 0.67 (0.63- 0.72) | 0.56 (0.52- 0.60) | 0.80 (0.78 - 0.82)      | <0.0001              |
| WCRF <sup>e</sup>        | 1 (ref) | 0.88 (0.82- 0.94) | 0.81 (0.76- 0.87) | 0.78 (0.72- 0.83) | 0.90 (0.88 - 0.92)      | 0.0004               |

**Abbreviations:** MDS, Mediterranean Diet Scale; rMED, relative Mediterranean diet score; MSDPS, Mediterranean Style Dietary Pattern Score; DQI-I, Diet Quality Index – International; HNFI, Healthy Nordic Food Index; HEI-2010, Healthy Eating Index 2010; WHO HDI, World Health Organization Healthy Diet Index; DASH, Dietary Approaches to Stop Hypertension; HLI, Healthy Lifestyle Index; HLI-diet, diet component of the HLI; WCRF, World Cancer Research Fund / American Institute for Cancer Research; Q, quartile of diet quality score

<sup>a</sup> Model including the following predictors: dietary score, energy intake and age at baseline, BMI (continuous), Physical activity (Cambridge index), smoking status (3 categories) and educational level, unless otherwise stated. Stratified by sex and study centre.

<sup>b</sup> HR for the increase of 1 SD of score

<sup>c</sup> p-value for linear trend across quartiles

<sup>d</sup> Model only including HLI, age, energy intake and educational level because BMI, physical activity, smoking are components of the Healthy Lifestyle Index, n=376,553

<sup>e</sup> Model only including WCRF score, age, energy intake, smoking and educational level as BMI and physical activity are components of the WCRF score, n=363,207
