# Supplementary material for: Diet Quality Scores and Prediction of All-Cause, Cardiovascular and Cancer Mortality in a Pan-European Cohort Study
Source: PubMed Central journal article supplement (PMC4943719; doi:10.1371/journal.pone.0159025), 2016-07-13
Supplement: pone.0159025.s009.pdf [file pone.0159025.s009.pdf]

**S4 Table. C statistic of the baseline model <sup>a</sup>, Model 1 <sup>b</sup> and Model 2 <sup>c</sup> for the prediction of 10-year mortality risk in 451,256 participants to the EPIC study**

| Score                    | Baseline model <sup>a</sup> | Model 1 <sup>b</sup> | Difference Model 1 - baseline | Model 2 <sup>c</sup> | Difference Model 2 - Baseline |
|--------------------------|-----------------------------|----------------------|-------------------------------|----------------------|-------------------------------|
| <b>All cause</b>         |                             |                      |                               |                      |                               |
| MDS                      | 0.704 (0.699-0.708)         | 0.709 (0.704-0.714)  | 0.005                         | 0.733 (0.729-0.738)  | 0.029                         |
| rMED                     | 0.704 (0.699-0.708)         | 0.711 (0.707-0.716)  | 0.007                         | 0.734 (0.729-0.739)  | 0.030                         |
| MSDPS                    | 0.704 (0.699-0.708)         | 0.709 (0.704-0.713)  | 0.005                         | 0.733 (0.728-0.738)  | 0.029                         |
| DQI                      | 0.704 (0.699-0.708)         | 0.712 (0.707-0.716)  | 0.008                         | 0.734 (0.729-0.738)  | 0.030                         |
| HNFI                     | 0.704 (0.699-0.708)         | 0.708 (0.703-0.712)  | 0.004                         | 0.733 (0.728-0.737)  | 0.029                         |
| HEI-2010                 | 0.704 (0.699-0.708)         | 0.709 (0.705-0.714)  | 0.005                         | 0.733 (0.729-0.738)  | 0.029                         |
| WHOHD                    | 0.704 (0.699-0.708)         | 0.706 (0.701-0.710)  | 0.002                         | 0.732 (0.728-0.737)  | 0.028                         |
| DASH                     | 0.704 (0.699-0.708)         | 0.710 (0.705-0.714)  | 0.006                         | 0.733 (0.728-0.738)  | 0.029                         |
| HLI - diet               | 0.704 (0.699-0.708)         | 0.708 (0.703-0.713)  | 0.004                         | 0.733 (0.728-0.737)  | 0.029                         |
| HLI - total <sup>d</sup> | 0.705 (0.700-0.710)         | 0.718 (0.713-0.723)  | 0.013                         | 0.720 (0.715-0.725)  | 0.015                         |
| WCRF <sup>e</sup>        | 0.702 (0.697-0.708)         | 0.711 (0.706-0.716)  | 0.008                         | 0.732 (0.727-0.737)  | 0.029                         |
| <b>CVD</b>               |                             |                      |                               |                      |                               |
| MDS                      | 0.77 (0.761-0.779)          | 0.774 (0.765-0.783)  | 0.004                         | 0.804 (0.796-0.812)  | 0.034                         |
| rMED                     | 0.77 (0.761-0.779)          | 0.776 (0.767-0.785)  | 0.006                         | 0.805 (0.797-0.813)  | 0.035                         |
| MSDPS                    | 0.77 (0.761-0.779)          | 0.774 (0.765-0.783)  | 0.004                         | 0.804 (0.796-0.812)  | 0.034                         |
| DQI                      | 0.77 (0.761-0.779)          | 0.776 (0.767-0.785)  | 0.006                         | 0.805 (0.797-0.813)  | 0.035                         |
| HNFI                     | 0.77 (0.761-0.779)          | 0.773 (0.764-0.782)  | 0.003                         | 0.804 (0.796-0.812)  | 0.034                         |
| HEI-2010                 | 0.77 (0.761-0.779)          | 0.774 (0.765-0.783)  | 0.004                         | 0.804 (0.796-0.812)  | 0.034                         |
| WHOHD                    | 0.77 (0.761-0.779)          | 0.773 (0.764-0.782)  | 0.003                         | 0.804 (0.796-0.812)  | 0.034                         |
| DASH                     | 0.77 (0.761-0.779)          | 0.776 (0.767-0.785)  | 0.006                         | 0.805 (0.796-0.813)  | 0.035                         |
| HLI - diet               | 0.77 (0.761-0.779)          | 0.775 (0.766-0.783)  | 0.005                         | 0.804 (0.796-0.812)  | 0.034                         |
| HLI - total <sup>d</sup> | 0.776 (0.766-0.786)         | 0.789 (0.78-0.799)   | 0.013                         | 0.792 (0.782-0.801)  | 0.015                         |
| WCRF <sup>e</sup>        | 0.769 (0.759-0.779)         | 0.776 (0.766-0.785)  | 0.006                         | 0.796 (0.787-0.805)  | 0.027                         |
| <b>Cancer</b>            |                             |                      |                               |                      |                               |
| MDS                      | 0.681 (0.675-0.688)         | 0.686 (0.68-0.693)   | 0.005                         | 0.706 (0.700-0.713)  | 0.025                         |
| rMED                     | 0.681 (0.675-0.688)         | 0.688 (0.681-0.694)  | 0.007                         | 0.707 (0.700-0.713)  | 0.026                         |
| MSDPS                    | 0.681 (0.675-0.688)         | 0.685 (0.678-0.692)  | 0.004                         | 0.706 (0.699-0.712)  | 0.025                         |
| DQI                      | 0.681 (0.675-0.688)         | 0.689 (0.682-0.696)  | 0.008                         | 0.706 (0.700-0.713)  | 0.025                         |
| HNFI                     | 0.681 (0.675-0.688)         | 0.685 (0.679-0.692)  | 0.004                         | 0.706 (0.699-0.712)  | 0.025                         |
| HEI-2010                 | 0.681 (0.675-0.688)         | 0.687 (0.68-0.694)   | 0.006                         | 0.706 (0.700-0.713)  | 0.025                         |
| WHOHD                    | 0.681 (0.675-0.688)         | 0.683 (0.676-0.69)   | 0.002                         | 0.705 (0.698-0.711)  | 0.024                         |
| DASH                     | 0.681 (0.675-0.688)         | 0.686 (0.679-0.693)  | 0.005                         | 0.706 (0.699-0.712)  | 0.025                         |
| HLI - diet               | 0.681 (0.675-0.688)         | 0.686 (0.679-0.693)  | 0.005                         | 0.706 (0.699-0.712)  | 0.025                         |
| HLI - total <sup>d</sup> | 0.679 (0.671-0.686)         | 0.692 (0.684-0.699)  | 0.013                         | 0.693 (0.686-0.700)  | 0.014                         |
| WCRF <sup>e</sup>        | 0.678 (0.67-0.685)          | 0.684 (0.676-0.691)  | 0.006                         | 0.705 (0.698-0.712)  | 0.027                         |

**Abbreviations:** MDS, Mediterranean Diet Scale; rMED, relative Mediterranean diet score; MSDPS, Mediterranean Style Dietary Pattern Score; DQI-I, Diet Quality Index – International; HNFI, Healthy Nordic Food Index; HEI-2010, Healthy Eating Index 2010; WHO HDI, World Health Organization Healthy Diet Index; DASH, Dietary Approach to Stop Hypertension; HLI, Healthy Lifestyle Index; HLI-diet, diet component of the HLI; WCRF, World Cancer Research Fund / American Institute for Cancer Research

<sup>a</sup> Baseline model includes only age as a predictor, stratified by sex and center;

<sup>b</sup> Model 1 = baseline + dietary score;

<sup>c</sup> Model 2= Model 1+ lifestyle factors: smoking, BMI, physical activity, educational level unless otherwise stated

<sup>d</sup> Model 2 = Model 1 + educational level because BMI, physical activity, smoking are components of the Healthy Lifestyle Index, n=376,553

<sup>e</sup> Model 2 = Model 1 + smoking and educational level as BMI and physical activity are components of the WCRF score, n=363,207
