# Supplementary material for: Diet Quality Scores and Prediction of All-Cause, Cardiovascular and Cancer Mortality in a Pan-European Cohort Study
Source: PubMed Central journal article supplement (PMC4943719; doi:10.1371/journal.pone.0159025), 2016-07-13
Supplement: pone.0159025.s010.pdf [file pone.0159025.s010.pdf]

**S5 Table. C statistic of the dietary scores alone for 10-year risk of all-cause, CVD and cancer mortality in 451,256 participants to the EPIC study**

| <b>Score</b>     | <b>C-statistic (95% CI)</b> |
|------------------|-----------------------------|
| <b>All-cause</b> |                             |
| MDS              | 0.55 (0.545 - 0.555)        |
| rMED             | 0.556 (0.551 - 0.561)       |
| MSDPS            | 0.547 (0.542 - 0.552)       |
| DQI              | 0.549 (0.543 - 0.554)       |
| HNFI             | 0.511 (0.506 - 0.516)       |
| HEI-2010         | 0.54 (0.535 - 0.546)        |
| WHO HDI          | 0.523 (0.518 - 0.528)       |
| DASH             | 0.541 (0.536 - 0.546)       |
| HLI diet         | 0.534 (0.529 - 0.539)       |
| HLI total        | 0.568 (0.563 - 0.574)       |
| WCRF             | 0.587 (0.581 - 0.592)       |
| <b>CVD</b>       |                             |
| MDS              | 0.559 (0.548 - 0.569)       |
| rMED             | 0.563 (0.553 - 0.574)       |
| MSDPS            | 0.551 (0.54 - 0.561)        |
| DQI              | 0.553 (0.542 - 0.563)       |
| HNFI             | 0.506 (0.496 - 0.516)       |
| HEI-2010         | 0.543 (0.532 - 0.554)       |
| WHO HDI          | 0.536 (0.526 - 0.546)       |
| DASH             | 0.551 (0.54 - 0.561)        |
| HLI diet         | 0.543 (0.533 - 0.554)       |
| HLI total        | 0.586 (0.575 - 0.597)       |
| WCRF             | 0.612 (0.602 - 0.623)       |
| <b>Cancer</b>    |                             |
| MDS              | 0.539 (0.532 - 0.547)       |
| rMED             | 0.542 (0.534 - 0.549)       |
| MSDPS            | 0.535 (0.527 - 0.542)       |
| DQI              | 0.535 (0.528 - 0.543)       |
| HNFI             | 0.509 (0.502 - 0.517)       |
| HEI-2010         | 0.529 (0.522 - 0.537)       |
| WHO HDI          | 0.519 (0.512 - 0.527)       |
| DASH             | 0.532 (0.525 - 0.54)        |
| HLI diet         | 0.526 (0.519 - 0.533)       |
| HLI total        | 0.562 (0.554 - 0.569)       |
| WCRF             | 0.563 (0.555 - 0.571)       |
