# Supplementary material for: Diet Quality Scores and Prediction of All-Cause, Cardiovascular and Cancer Mortality in a Pan-European Cohort Study
Source: PubMed Central journal article supplement (PMC4943719; doi:10.1371/journal.pone.0159025), 2016-07-13
Supplement: pone.0159025.s011.pdf [file pone.0159025.s011.pdf]

**S6 Table. Geographical differences in dietary scores across EPIC centres**

|         |                           | N     | MDS  |     | rMED |     | MSDPS |     | HLI diet |     | HNFI |     | WHO HDI |     | HEI 2010 |     | DQI-I |     | DASH |     | WCRF |     |
|---------|---------------------------|-------|------|-----|------|-----|-------|-----|----------|-----|------|-----|---------|-----|----------|-----|-------|-----|------|-----|------|-----|
|         |                           |       | Mean | SD  | Mean | SD  | Mean  | SD  | Mean     | SD  | Mean | SD  | Mean    | SD  | Mean     | SD  | Mean  | SD  | Mean | SD  | Mean | SD  |
| Norway  | South-East                | 19021 | 3.7  | 1.3 | 8.1  | 2.4 | 24.0  | 6.5 | 31.6     | 7.9 | 3.0  | 1.3 | 3.2     | 0.8 | 57.9     | 7.0 | 56.9  | 7.7 | 18.8 | 3.1 | .    | .   |
|         | North-West                | 15488 | 3.6  | 1.2 | 7.8  | 2.2 | 22.0  | 6.1 | 31.5     | 7.7 | 3.0  | 1.3 | 3.1     | 0.8 | 57.4     | 6.9 | 56.8  | 7.5 | 18.5 | 3.0 | .    | .   |
| France  | Ile-de-France             | 12436 | 4.4  | 1.5 | 8.9  | 2.7 | 25.3  | 6.8 | 31.6     | 8.0 | 3.0  | 1.3 | 3.3     | 0.8 | 63.2     | 7.0 | 58.4  | 6.7 | 22.9 | 3.2 | 2.4  | 1.0 |
|         | North-West                | 11527 | 4.4  | 1.4 | 9.1  | 2.7 | 24.6  | 6.6 | 31.5     | 7.8 | 3.0  | 1.3 | 3.3     | 0.8 | 63.1     | 6.6 | 58.4  | 6.5 | 23.1 | 3.2 | 2.3  | 1.0 |
|         | North-East                | 14318 | 4.1  | 1.5 | 8.5  | 2.7 | 23.6  | 6.5 | 31.7     | 7.9 | 3.0  | 1.3 | 3.3     | 0.8 | 62.5     | 6.9 | 57.5  | 6.7 | 22.7 | 3.2 | 2.3  | 1.0 |
|         | Rhone-Alpes               | 8850  | 4.4  | 1.4 | 9.3  | 2.6 | 24.7  | 6.6 | 31.6     | 7.8 | 3.0  | 1.3 | 3.5     | 0.8 | 63.3     | 6.4 | 59.5  | 6.5 | 23.6 | 3.1 | 2.5  | 1.0 |
|         | Provence                  | 8865  | 4.6  | 1.5 | 9.3  | 2.6 | 25.2  | 6.9 | 31.4     | 7.8 | 3.0  | 1.3 | 3.5     | 0.8 | 63.5     | 6.9 | 59.2  | 6.7 | 23.5 | 3.1 | 2.5  | 1.0 |
|         | South-West                | 9609  | 4.6  | 1.5 | 9.1  | 2.6 | 24.9  | 6.7 | 31.4     | 7.8 | 3.0  | 1.3 | 3.4     | 0.8 | 63.5     | 6.6 | 58.9  | 6.6 | 23.5 | 3.2 | 2.5  | 1.0 |
| Italy   | Florence                  | 12218 | 5.1  | 1.3 | 10.8 | 2.3 | 28.4  | 6.8 | 31.5     | 7.8 | 2.6  | 1.3 | 3.2     | 0.8 | 58.4     | 7.6 | 58.1  | 6.9 | 21.6 | 3.3 | 2.7  | 1.0 |
|         | Varese                    | 10756 | 4.6  | 1.4 | 10.1 | 2.3 | 26.3  | 6.8 | 31.5     | 7.8 | 3.0  | 1.2 | 3.1     | 0.8 | 59.0     | 7.7 | 55.0  | 6.6 | 20.7 | 3.4 | 2.5  | 1.0 |
|         | Ragusa                    | 5729  | 5.1  | 1.1 | 10.9 | 2.0 | 25.4  | 6.1 | 31.5     | 7.3 | 2.6  | 1.2 | 3.7     | 0.8 | 55.5     | 6.7 | 61.1  | 7.2 | 20.6 | 3.1 | 2.6  | 1.0 |
|         | Turin                     | 9384  | 5.0  | 1.3 | 11.2 | 2.4 | 28.5  | 6.9 | 31.6     | 7.6 | 2.8  | 1.3 | 3.2     | 0.8 | 58.9     | 8.0 | 57.4  | 6.7 | 21.2 | 3.4 | 2.8  | 1.0 |
|         | Naples                    | 4720  | 6.6  | 1.0 | 13.1 | 1.9 | 31.2  | 6.2 | 31.4     | 7.2 | 2.5  | 1.4 | 3.7     | 0.8 | 63.5     | 5.7 | 61.7  | 6.2 | 25.7 | 2.8 | 2.2  | 0.9 |
| Spain   | Asturias                  | 8023  | 5.0  | 1.3 | 10.3 | 2.4 | 28.9  | 8.0 | 31.8     | 7.7 | 3.0  | 1.1 | 3.2     | 0.9 | 65.5     | 7.7 | 56.4  | 8.6 | 23.3 | 3.4 | 2.3  | 1.0 |
|         | Granada                   | 6785  | 5.5  | 1.3 | 11.5 | 2.3 | 31.8  | 8.0 | 31.7     | 7.9 | 4.0  | 0.7 | 3.5     | 0.8 | 63.9     | 7.0 | 58.7  | 7.5 | 24.6 | 3.2 | 2.6  | 0.9 |
|         | Murcia                    | 7411  | 5.9  | 1.2 | 11.9 | 2.4 | 28.7  | 7.2 | 31.5     | 7.6 | 3.5  | 0.9 | 3.8     | 0.8 | 64.7     | 6.8 | 60.9  | 6.9 | 25.0 | 3.1 | 2.7  | 1.0 |
|         | Navarra                   | 7484  | 5.4  | 1.2 | 10.7 | 2.5 | 29.0  | 7.7 | 31.6     | 7.6 | 3.5  | 0.9 | 3.4     | 0.8 | 65.1     | 7.8 | 57.4  | 7.3 | 23.6 | 3.2 | 2.4  | 1.0 |
|         | San Sebastian             | 7627  | 5.6  | 1.2 | 11.3 | 2.5 | 30.0  | 8.0 | 31.3     | 7.3 | 3.2  | 1.0 | 3.4     | 0.9 | 64.3     | 7.8 | 59.6  | 8.1 | 24.1 | 3.4 | 2.5  | 1.0 |
| UK      | Cambridge                 | 20514 | 4.1  | 1.5 | 8.3  | 2.6 | 21.5  | 6.7 | 31.8     | 8.3 | 2.6  | 1.3 | 3.4     | 0.9 | 60.6     | 8.8 | 58.9  | 8.5 | 21.7 | 3.7 | 2.6  | 1.0 |
|         | Oxford health conscious   | 43163 | 5.0  | 1.4 | 10.8 | 2.4 | 23.6  | 6.5 | 31.4     | 7.4 | 2.6  | 1.3 | 4.0     | 0.9 | 61.0     | 8.0 | 61.3  | 8.2 | 24.0 | 3.7 | 3.1  | 1.1 |
|         | Oxford general population | 6318  | 4.4  | 1.5 | 9.3  | 2.5 | 24.0  | 6.2 | 31.7     | 8.3 | 2.6  | 1.4 | 3.4     | 0.9 | 60.8     | 7.9 | 59.6  | 8.2 | 21.7 | 3.7 | 2.4  | 1.0 |
| Holland | Bilthoven                 | 20210 | 2.6  | 1.3 | 6.2  | 2.5 | 17.7  | 5.7 | 31.5     | 7.7 | 2.6  | 1.3 | 3.4     | 0.8 | 54.5     | 8.9 | 55.2  | 7.3 | 18.7 | 3.2 | 2.7  | 1.0 |
|         | Utrecht                   | 14631 | 2.4  | 1.2 | 6.0  | 2.4 | 18.5  | 5.7 | 31.5     | 7.8 | 2.6  | 1.2 | 3.6     | 0.8 | 60.6     | 7.4 | 58.0  | 6.7 | 20.3 | 3.2 | 2.6  | 1.0 |
| Greece  | Greece                    | 22965 | 6.0  | 1.0 | 12.6 | 1.9 | 31.0  | 6.8 | 31.5     | 6.9 | 3.0  | 1.2 | 4.1     | 0.5 | 64.9     | 6.4 | 62.7  | 4.8 | 25.2 | 2.7 | 3.1  | 1.0 |
| Germany | Heidelberg                | 22468 | 2.8  | 1.3 | 7.8  | 2.6 | 19.3  | 6.1 | 31.4     | 7.5 | 2.5  | 1.3 | 2.9     | 0.7 | 50.7     | 9.0 | 53.4  | 7.9 | 18.7 | 3.2 | 2.3  | 1.0 |
|         | Potsdam                   | 23045 | 2.7  | 1.3 | 7.1  | 2.4 | 18.6  | 5.6 | 31.5     | 7.1 | 2.5  | 1.3 | 3.0     | 0.8 | 51.2     | 8.2 | 56.1  | 6.9 | 18.3 | 2.9 | 2.4  | 1.0 |
| Sweden  | Malmo                     | 22705 | 2.9  | 1.4 | 6.2  | 2.5 | 16.9  | 5.6 | 31.5     | 8.2 | 2.7  | 1.2 | 2.9     | 0.8 | 57.0     | 8.3 | 54.7  | 7.8 | 18.4 | 3.5 | 2.4  | 1.0 |
|         | Umea                      | 23796 | 2.6  | 1.3 | 5.3  | 2.1 | 11.5  | 4.5 | 31.4     | 8.0 | 2.9  | 1.4 | 3.3     | 0.7 | 49.1     | 8.4 | 52.6  | 9.5 | 17.8 | 3.2 |      |     |
| Denmark | Aarhus                    | 15508 | 3.0  | 1.4 | 6.7  | 2.6 | 20.2  | 6.4 | 31.5     | 8.3 | 2.5  | 1.4 | 3.0     | 0.9 | 54.1     | 8.8 | 56.8  | 7.3 | 17.9 | 3.5 | 2.6  | 1.0 |
|         | Copenhagen                | 35682 | 3.2  | 1.4 | 7.1  | 2.8 | 21.1  | 6.8 | 31.5     | 8.4 | 2.5  | 1.4 | 3.1     | 0.9 | 53.3     | 9.7 | 57.0  | 7.9 | 18.3 | 3.6 | 2.5  | 1.0 |

**Abbreviations:** MDS, Mediterranean Diet Scale; rMED, relative Mediterranean diet score; MSDPS, Mediterranean Style Dietary Pattern Score; DQI-I, Diet Quality Index – International; HNFI, Healthy Nordic Food Index; HEI-2010, Healthy Eating Index 2010; WHO HDI, World Health Organization Healthy Diet Index; DASH, Dietary Approach to Stop Hypertension; HLI, Healthy Lifestyle Index; HLI-diet, diet component of the HLI; WCRF, World Cancer Research Fund / American Institute for Cancer Research
