# Supplementary material for: Diet Quality Scores and Prediction of All-Cause, Cardiovascular and Cancer Mortality in a Pan-European Cohort Study
Source: PubMed Central journal article supplement (PMC4943719; doi:10.1371/journal.pone.0159025), 2016-07-13
Supplement: pone.0159025.s012.pdf [file pone.0159025.s012.pdf]

**S7 Table. Age and sex specific multivariate hazard ratios (Model 2: adjusted for age and lifestyle risk factors) for 10-year mortality risk for a 1SD increase of score among 451,256 participants of the EPIC study**

|                            | Sex <sup>a</sup>         |                          | Age <sup>b</sup>         |                          |
|----------------------------|--------------------------|--------------------------|--------------------------|--------------------------|
|                            | Men                      | Women                    | <50y                     | ≥50y                     |
| <b>All-cause mortality</b> | HR (95% CI) <sup>c</sup> | HR (95% CI) <sup>c</sup> | HR (95% CI) <sup>c</sup> | HR (95% CI) <sup>c</sup> |
| MDS                        | 0.91 (0.89 - 0.93)       | 0.92 (0.90 - 0.94)       | 0.92 (0.88 - 0.96)       | 0.91 (0.90 - 0.93)       |
| rMED                       | 0.87 (0.85 - 0.90)       | 0.91 (0.89 - 0.93)       | 0.91 (0.87 - 0.95)       | 0.89 (0.88 - 0.91)       |
| MSDPS                      | 0.91 (0.88 - 0.93)       | 0.93 (0.90 - 0.95)       | 0.91 (0.88 - 0.95)       | 0.92 (0.90 - 0.93)       |
| DQI-I                      | 0.90 (0.88 - 0.93)       | 0.89 (0.87 - 0.91)       | 0.89 (0.86 - 0.93)       | 0.90 (0.88 - 0.91)       |
| HNDS                       | 0.93 (0.91 - 0.95)       | 0.93 (0.91 - 0.95)       | 0.93 (0.89 - 0.97)       | 0.93 (0.92 - 0.95)       |
| HEI 2010                   | 0.90 (0.88 - 0.92)       | 0.92 (0.90 - 0.94)       | 0.93 (0.89 - 0.97)       | 0.91 (0.90 - 0.93)       |
| WHO HDI                    | 0.95 (0.93 - 0.97)       | 0.96 (0.93 - 0.98)       | 0.96 (0.92 - 1.00)       | 0.95 (0.94 - 0.97)       |
| DASH                       | 0.91 (0.89 - 0.93)       | 0.92 (0.90 - 0.94)       | 0.91 (0.88 - 0.95)       | 0.92 (0.90 - 0.94)       |
| HLI – diet                 | 0.94 (0.92 - 0.96)       | 0.93 (0.91 - 0.95)       | 0.96 (0.92 - 1.00)       | 0.93 (0.91 - 0.95)       |
| HLI - total <sup>d</sup>   | 0.77 (0.76 - 0.79)       | 0.80 (0.79 - 0.82)       | 0.82 (0.79 - 0.86)       | 0.78 (0.77 - 0.80)       |
| WCRF <sup>e</sup>          | 0.86 (0.84 - 0.88)       | 0.86 (0.84 - 0.88)       | 0.90 (0.86 - 0.95)       | 0.86 (0.84 - 0.87)       |
| <b>CVD mortality</b>       |                          |                          |                          |                          |
| MDS                        | 0.91 (0.87 - 0.95)       | 0.91 (0.87 - 0.96)       | 0.91 (0.82 - 1.01)       | 0.91 (0.88 - 0.95)       |
| rMED                       | 0.89 (0.85 - 0.93)       | 0.89 (0.84 - 0.93)       | 0.86 (0.78 - 0.96)       | 0.89 (0.86 - 0.93)       |
| MSDPS                      | 0.94 (0.90 - 0.98)       | 0.89 (0.85 - 0.94)       | 0.86 (0.78 - 0.96)       | 0.93 (0.90 - 0.96)       |
| DQI-I                      | 0.92 (0.88 - 0.96)       | 0.86 (0.82 - 0.90)       | 0.89 (0.80 - 0.99)       | 0.90 (0.87 - 0.93)       |
| HNDS                       | 0.93 (0.89 - 0.97)       | 0.93 (0.89 - 0.98)       | 0.87 (0.78 - 0.96)       | 0.94 (0.91 - 0.97)       |
| HEI 2010                   | 0.93 (0.89 - 0.97)       | 0.92 (0.87 - 0.96)       | 0.86 (0.78 - 0.95)       | 0.93 (0.90 - 0.97)       |
| WHO HDI                    | 0.95 (0.91 - 0.99)       | 0.91 (0.86 - 0.95)       | 0.85 (0.77 - 0.95)       | 0.94 (0.91 - 0.97)       |
| DASH                       | 0.90 (0.86 - 0.94)       | 0.89 (0.85 - 0.94)       | 0.84 (0.76 - 0.94)       | 0.90 (0.87 - 0.94)       |
| HLI – diet                 | 0.91 (0.87 - 0.95)       | 0.91 (0.87 - 0.96)       | 0.88 (0.80 - 0.98)       | 0.91 (0.88 - 0.95)       |
| HLI - total <sup>d</sup>   | 0.73 (0.7 - 0.77)        | 0.76 (0.72 - 0.80)       | 0.74 (0.66 - 0.83)       | 0.74 (0.72 - 0.77)       |
| WCRF <sup>e</sup>          | 0.83 (0.80 - 0.87)       | 0.83 (0.79 - 0.88)       | 0.87 (0.77 - 0.98)       | 0.83 (0.80 - 0.86)       |
| <b>Cancer</b>              |                          |                          |                          |                          |
| MDS                        | 0.93 (0.90 - 0.96)       | 0.92 (0.90 - 0.95)       | 0.92 (0.86 - 0.98)       | 0.93 (0.90 - 0.95)       |
| rMED                       | 0.90 (0.87 - 0.94)       | 0.93 (0.90 - 0.96)       | 0.94 (0.88 - 1.00)       | 0.91 (0.89 - 0.94)       |
| MSDPS                      | 0.92 (0.89 - 0.95)       | 0.95 (0.92 - 0.98)       | 0.95 (0.89 - 1.01)       | 0.93 (0.91 - 0.96)       |
| DQI-I                      | 0.91 (0.88 - 0.94)       | 0.91 (0.88 - 0.94)       | 0.89 (0.84 - 0.95)       | 0.91 (0.89 - 0.93)       |
| HNDS                       | 0.93 (0.90 - 0.97)       | 0.94 (0.91 - 0.97)       | 0.95 (0.90 - 1.02)       | 0.93 (0.91 - 0.96)       |
| HEI 2010                   | 0.90 (0.87 - 0.93)       | 0.94 (0.91 - 0.97)       | 0.97 (0.92 - 1.03)       | 0.92 (0.89 - 0.94)       |
| WHO HDI                    | 0.95 (0.92 - 0.99)       | 0.97 (0.95 - 1.00)       | 0.98 (0.92 - 1.04)       | 0.96 (0.94 - 0.99)       |
| DASH                       | 0.93 (0.90 - 0.97)       | 0.93 (0.90 - 0.96)       | 0.92 (0.86 - 0.98)       | 0.93 (0.91 - 0.96)       |
| HLI – diet                 | 0.95 (0.91 - 0.98)       | 0.93 (0.90 - 0.96)       | 0.94 (0.88 - 0.99)       | 0.94 (0.91 - 0.96)       |
| HLI - total <sup>d</sup>   | 0.77 (0.75 - 0.80)       | 0.82 (0.79 - 0.85)       | 0.84 (0.79 - 0.90)       | 0.80 (0.77 - 0.82)       |
| WCRF <sup>e</sup>          | 0.90 (0.87 - 0.93)       | 0.90 (0.87 - 0.93)       | 0.97 (0.90 - 1.04)       | 0.89 (0.87 - 0.91)       |

**Abbreviations:** MDS, Mediterranean Diet Scale; rMED, relative Mediterranean diet score; MSDPS, Mediterranean Style Dietary Pattern Score; DQI-I, Diet Quality Index – International; HNFI, Healthy Nordic Food Index; HEI-2010, Healthy Eating Index 2010; WHO HDI, World Health Organization Healthy Diet Index; DASH, Dietary Approach to Stop Hypertension; HLI, Healthy Lifestyle Index; HLI-diet, diet component of the HLI; WCRF, World Cancer Research Fund / American Institute for Cancer Research

<sup>a</sup> Model including the following predictors: age at baseline, BMI (continuous), Physical activity (Cambridge index), smoking status (3 categories) and educational level, unless otherwise stated. Stratified by study center.

<sup>b</sup> Model including the following predictors: age at baseline, BMI (continuous), Physical activity (Cambridge index), smoking status (3 categories) and educational level, unless otherwise stated. Stratified by sex and study center.

<sup>c</sup> HR for the increase of 1 SD of score

<sup>d</sup> Model only including HLL, age and educational level because BMI, physical activity, smoking are components of the Healthy Lifestyle Index, n=376,553

<sup>e</sup> Model only including WCRF score, smoking and educational level as BMI and physical activity are components of the WCRF score, n=363,207
